# Supplementary material
Source: PubMed Central journal article supplement (PMC8772536)

# Tau filaments assembled from all 6 brain isoforms

**A** Tau PHF filament from Alzheimer's disease brain (5o3L)

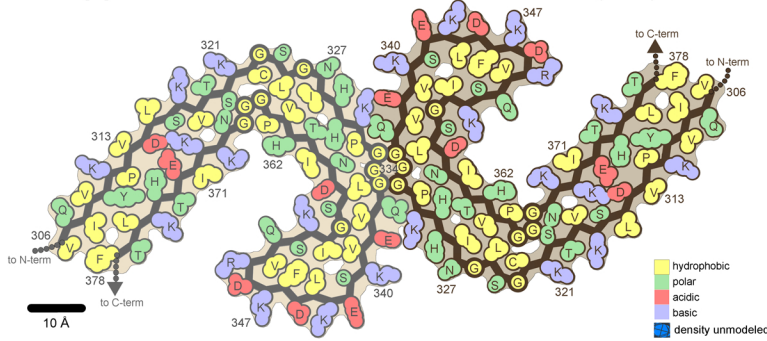

**B** Tau SF filament from Alzheimer's disease brain (5o3t)

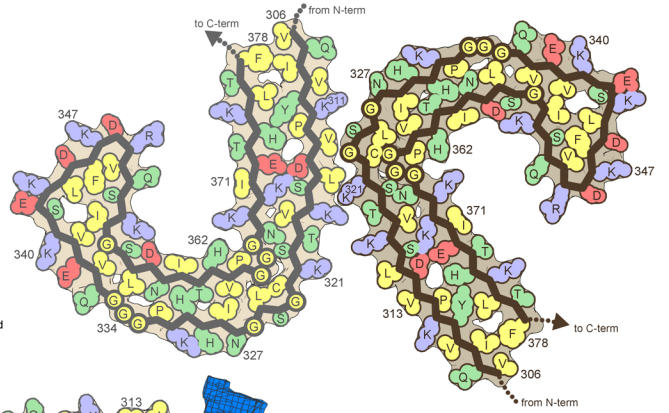

**C** Tau filament: chronic traumatic encephalopathy type I (6nwp)

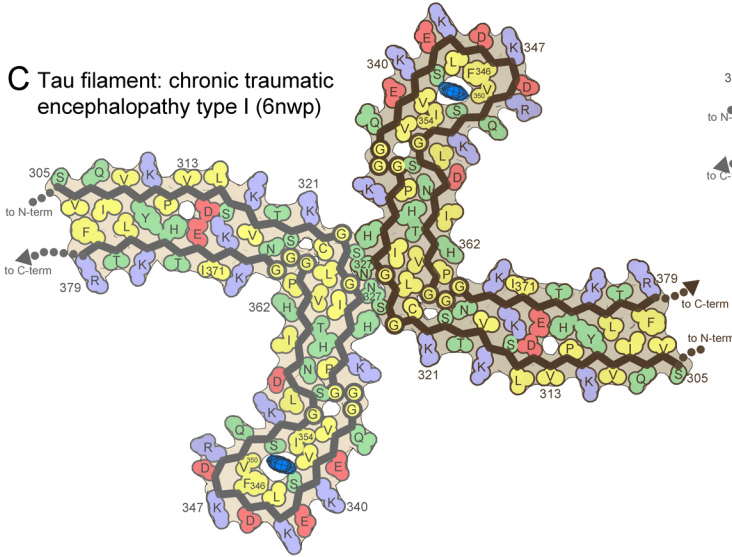

**D** Tau filament: chronic traumatic encephalopathy type II (6nwq)

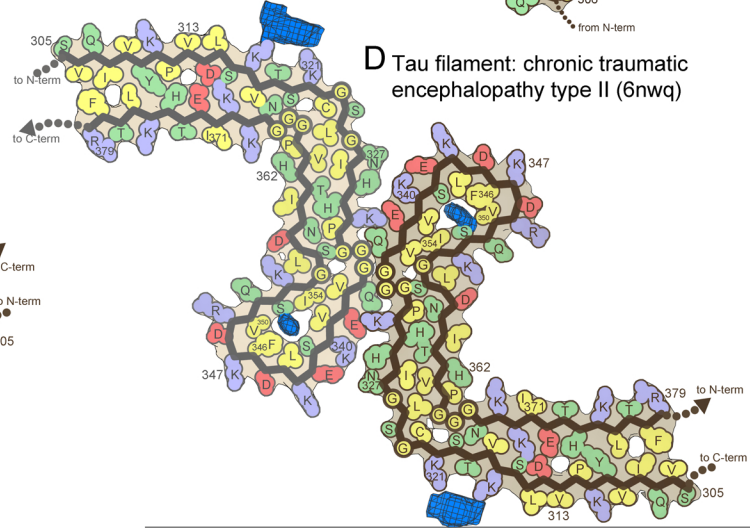

## 3R Tau filaments

**E** Tau filament from Pick's disease brain (6gx5)

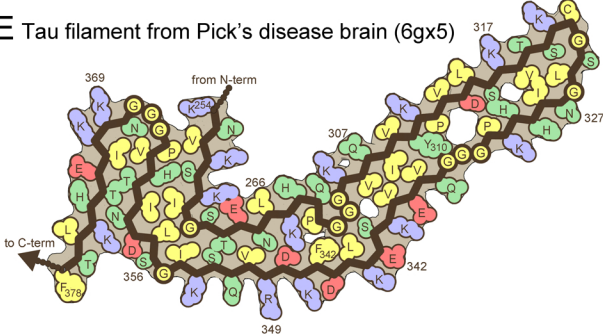

**F** Tau 3R heparin induced (6qjq)

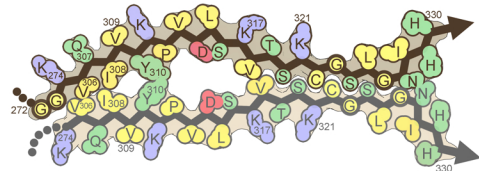

## 4R Tau filaments

**G** 4R tau Corticobasal Degeneration type I (6tjo)

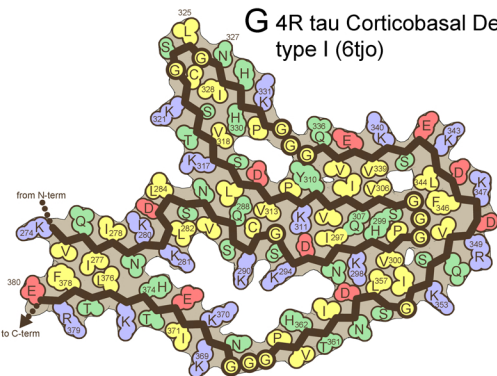

**H** 4R Tau : corticobasal degeneration type II (6tjx)

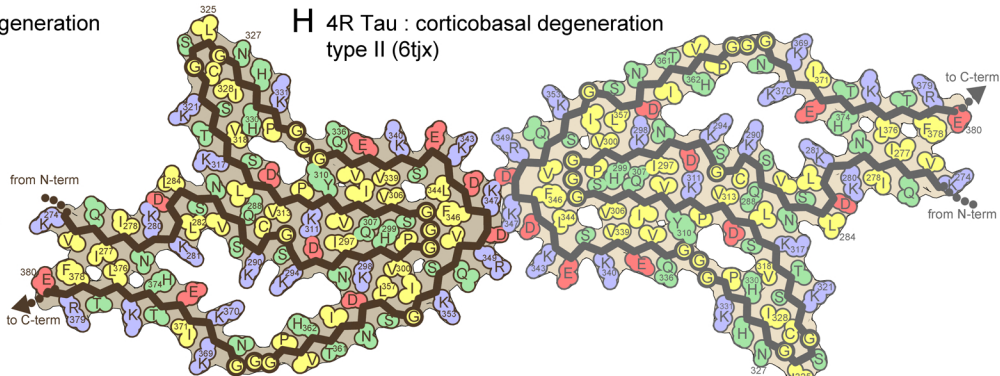

**I** 4R Tau heparin induced, Snake (6qjh)

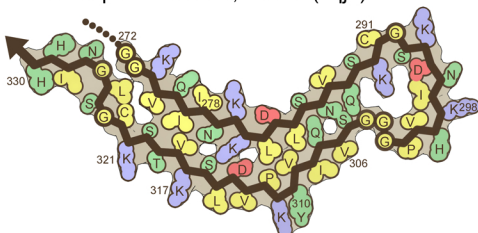

**J** 4R Tau heparin induced, Twister (6qjm)

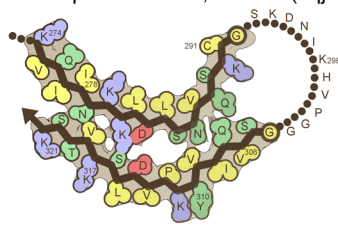

**K** 4R Tau heparin induced, Jagged (6qjp)

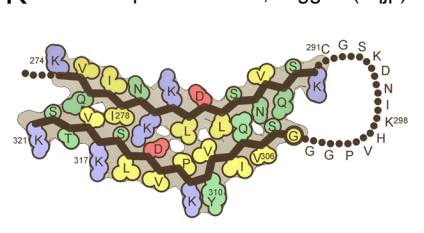

Supplement: NIHMS1739886-supplement-1.pdf [file NIHMS1739886-supplement-1.pdf]
