# Supplementary material
Source: PubMed Central journal article supplement (PMC8772536)

## Amyloid $\beta$ (1-42)

**A** Amyloid  $\beta$ (1-42) (5kk3)

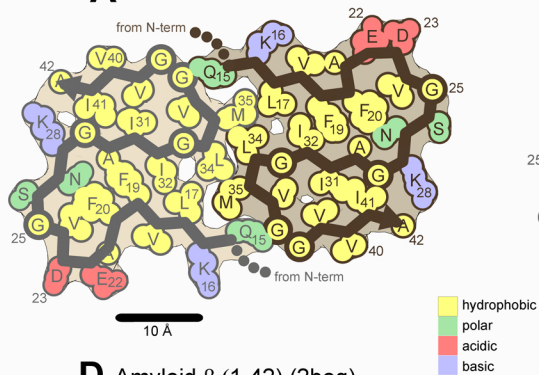

**B** Amyloid  $\beta$ (1-42) (2nao)

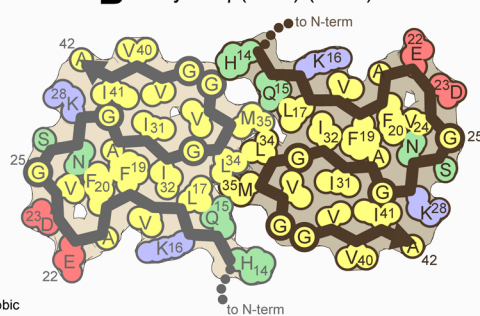

**C** Amyloid  $\beta$ (1-42) (5oqv)

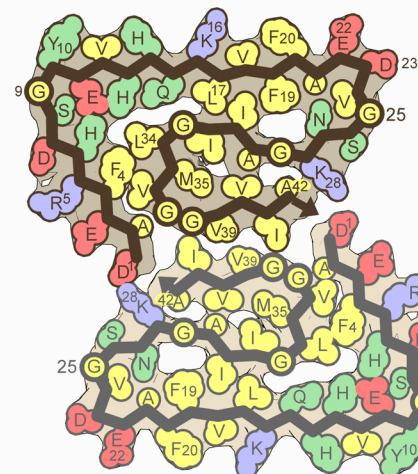

**D** Amyloid  $\beta$ (1-42) (2beg)

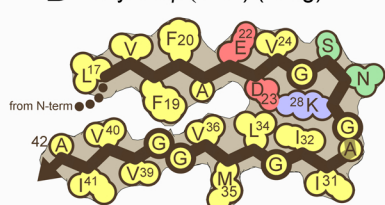

**E** Amyloid  $\beta$ (1-42) (2mxu)

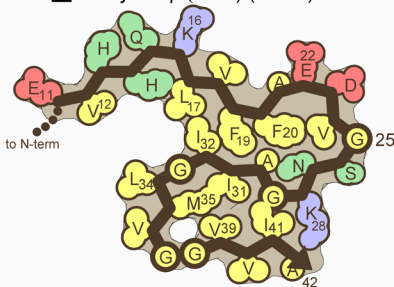

## Amyloid $\beta$ (1-40)

**F** Amyloid  $\beta$ (1-40) (+) stagger (2lmn)

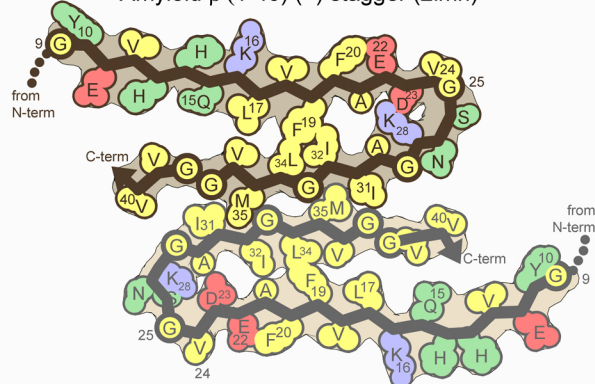

**I** Amyloid  $\beta$ (1-40) (6ti5)

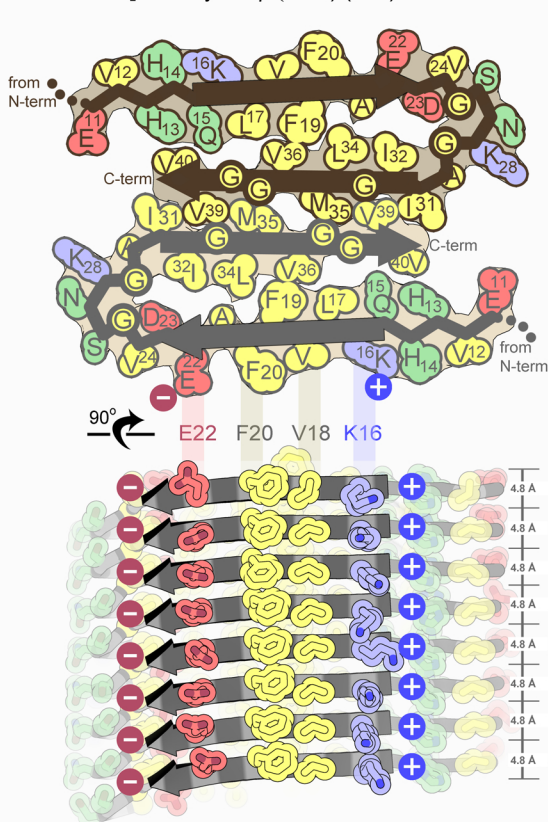

**J** Amyloid  $\beta$ (1-40) D23N (2lnq)

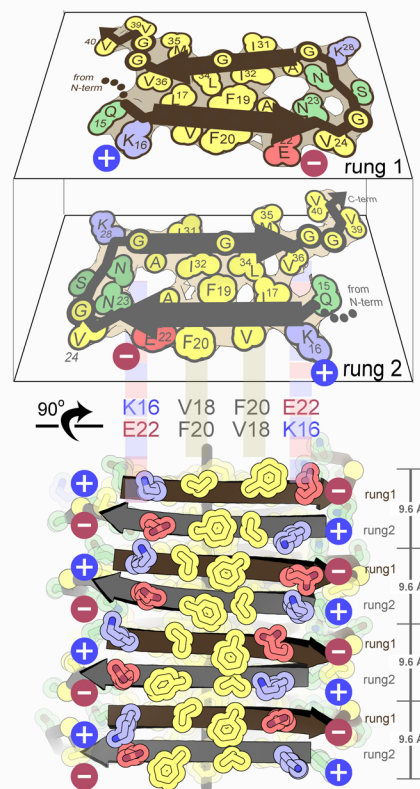

**G** Amyloid  $\beta$ (1-40) (-) stagger (2lmo)

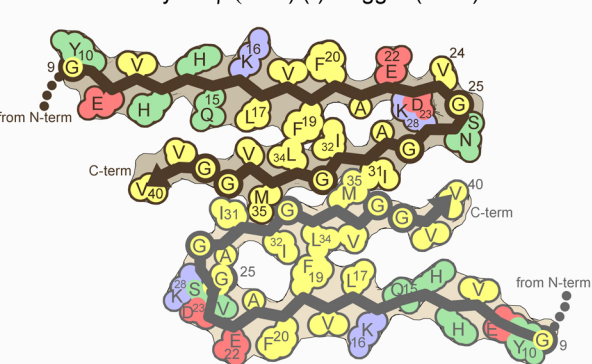

**H** Amyloid  $\beta$ (1-40) E22 $\Delta$  Osaka mutant (2mvx)

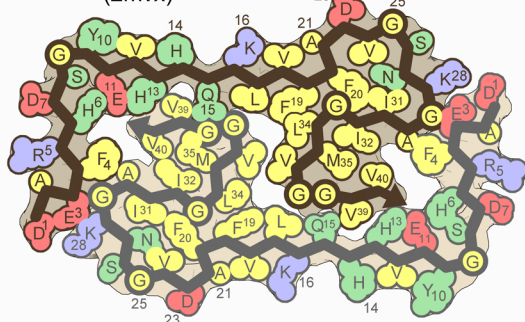

**K** Amyloid  $\beta$ (1-40) seeded by Alzheimer's patient (6w0o)

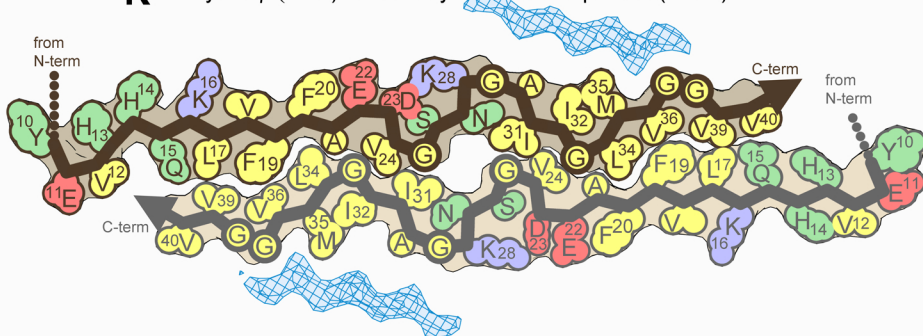

Supplement: NIHMS1739886-supplement-2.pdf [file NIHMS1739886-supplement-2.pdf]
