# Supplementary material
Source: PubMed Central journal article supplement (PMC8772536)

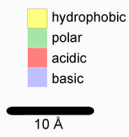

**A** Amyloid  $\beta$  (1-40) D23N Iowa mutant (2mpz)

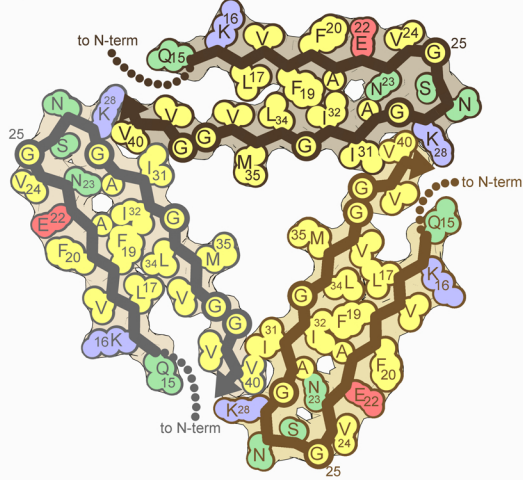

**B** Amyloid  $\beta$  (1-40) Alzheimer's brain seeded fibril (2m4j)

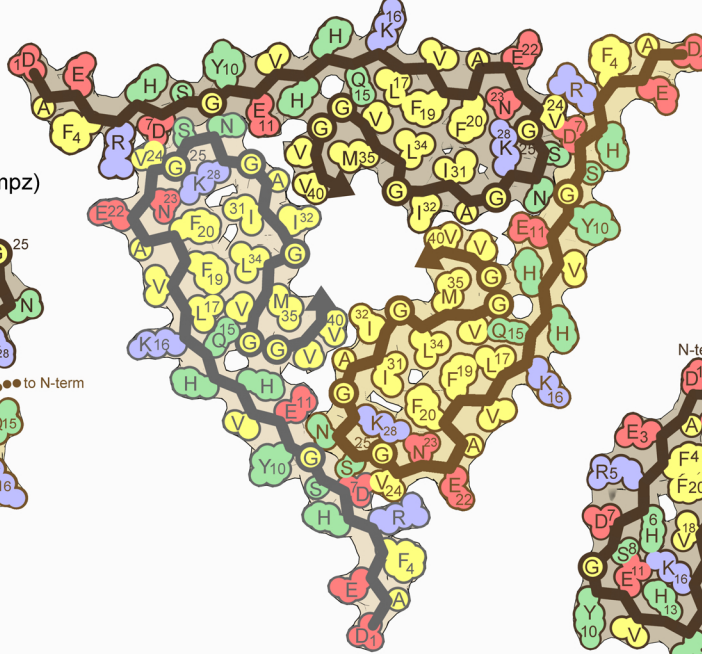

**C** Amyloid  $\beta$  (1-40 & shorter) (6shs) from Alzheimer's disease brain

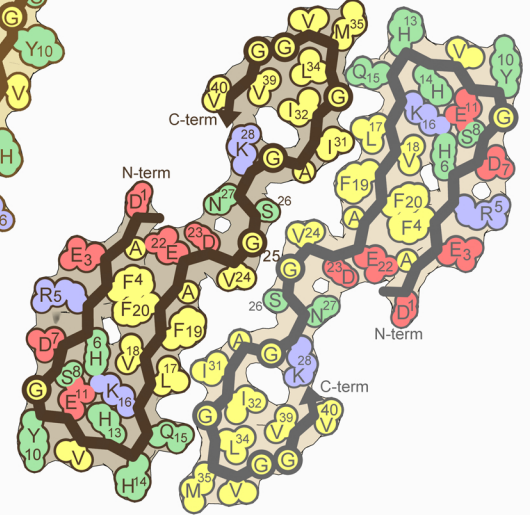

Islet Amyloid Polypeptide (IAPP)

**D** Islet Amyloid Polypeptide fibril (6vw2)

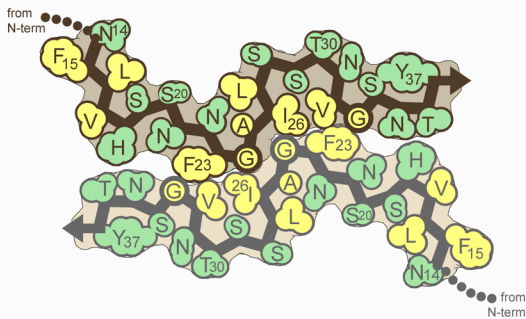

**E** Islet Amyloid Polypeptide fibril PM1 (6y1a)

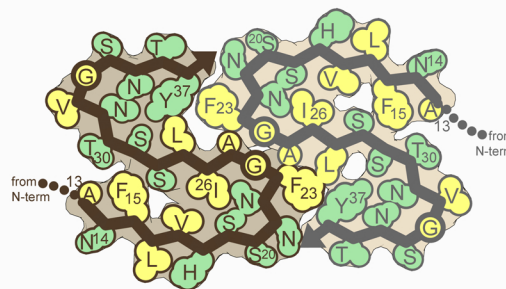

**F** Islet Amyloid Polypeptide fibril (6zrf)

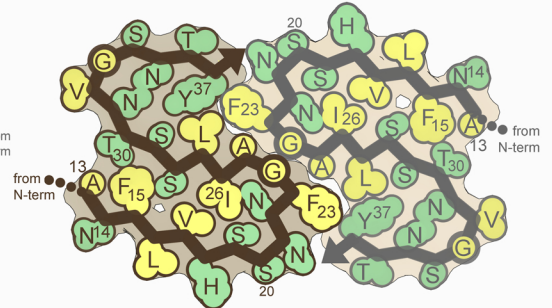

**G** Islet Amyloid Polypeptide fibril, S20G variant (6zrq)

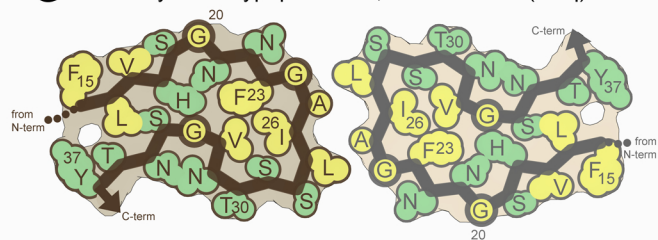

**H** Islet Amyloid Polypeptide fibril, S20G hereditary mutation (6zrr)

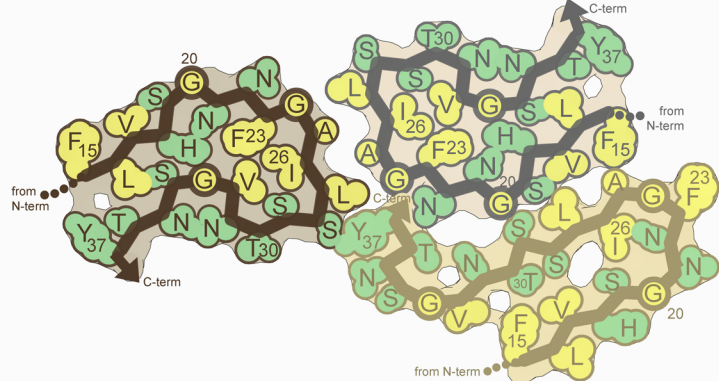

Supplement: NIHMS1739886-supplement-3.pdf [file NIHMS1739886-supplement-3.pdf]
