# Supplementary material
Source: PubMed Central journal article supplement (PMC8772536)

# α-synuclein ex vivo

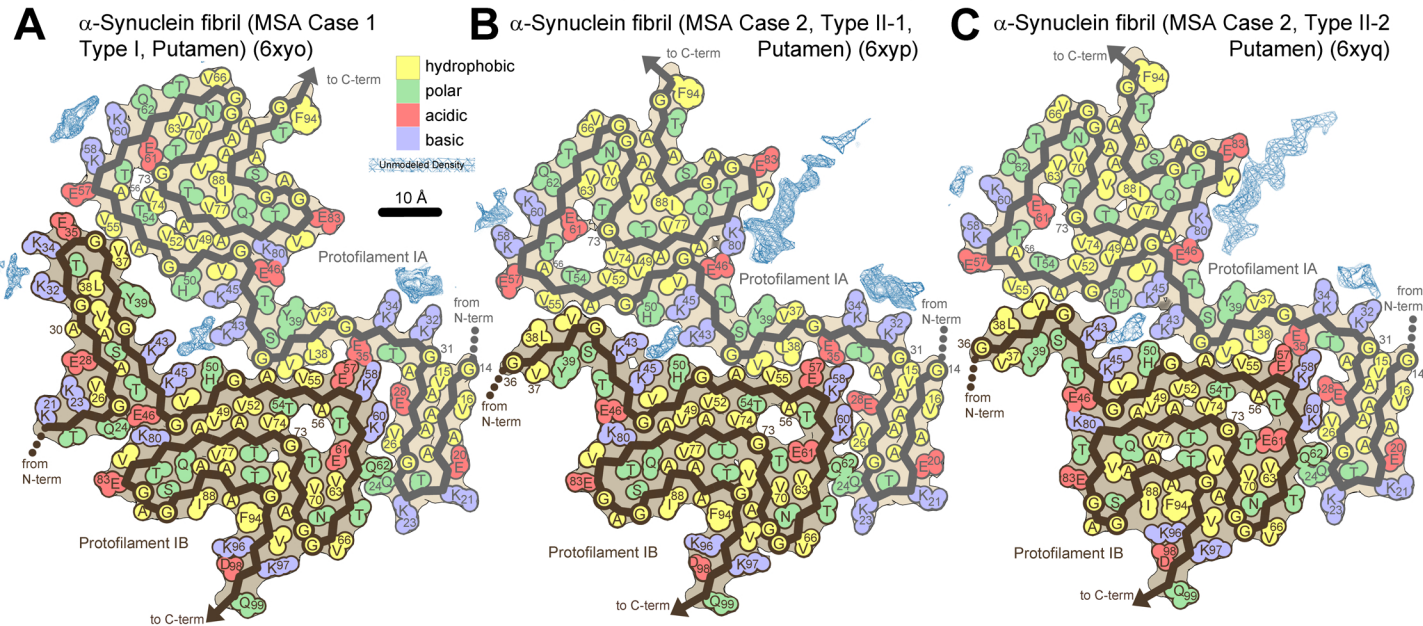

## α-synuclein polymorph 1b

## α-synuclein polymorph 2

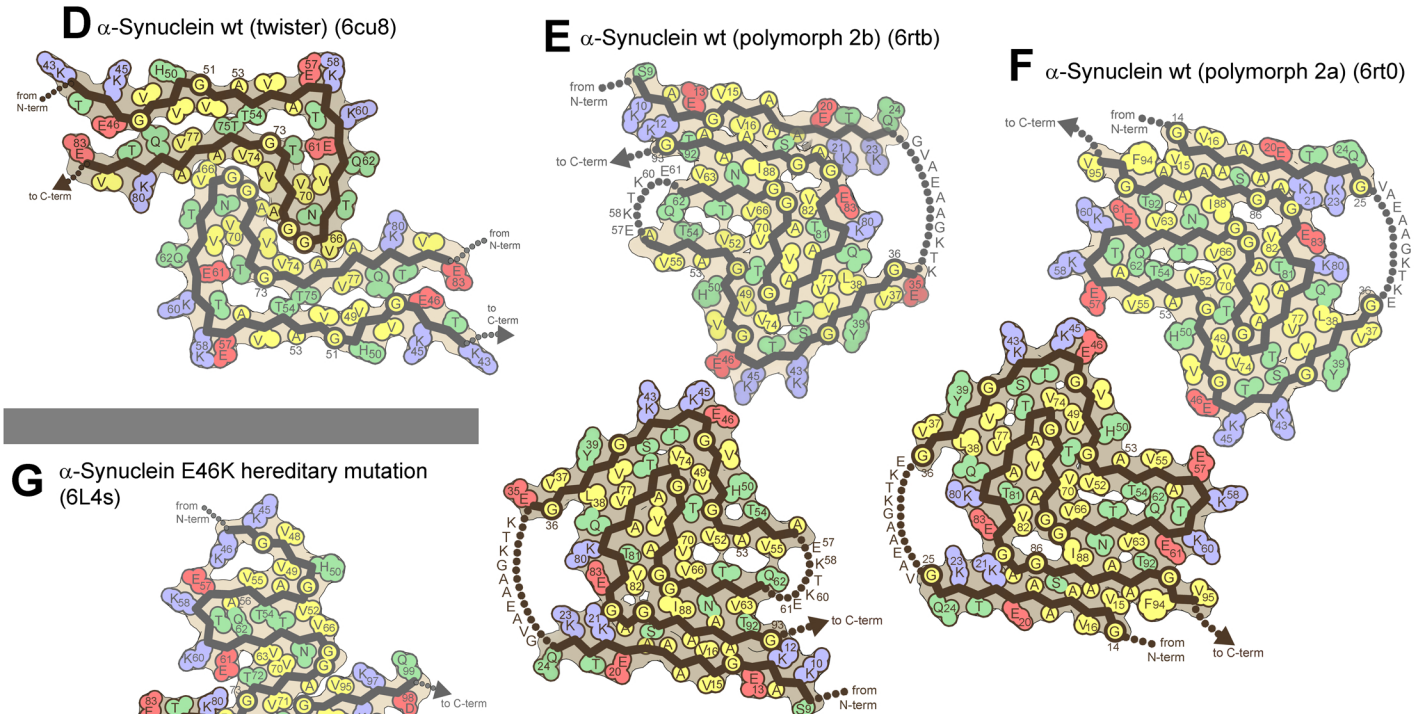

## G α-Synuclein E46K hereditary mutation (6L4s)

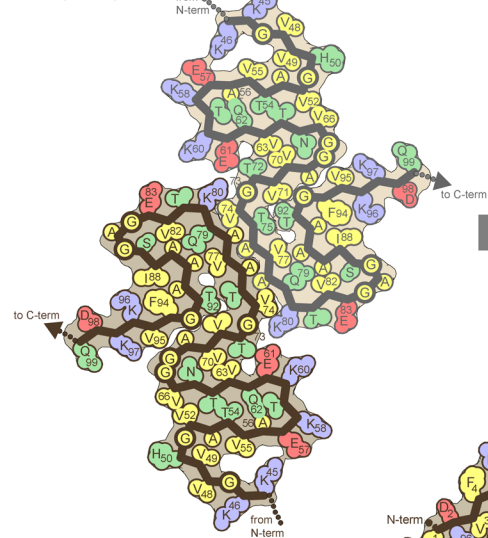

## H α-Synuclein fibril phospho-Tyr39 (6l1t)

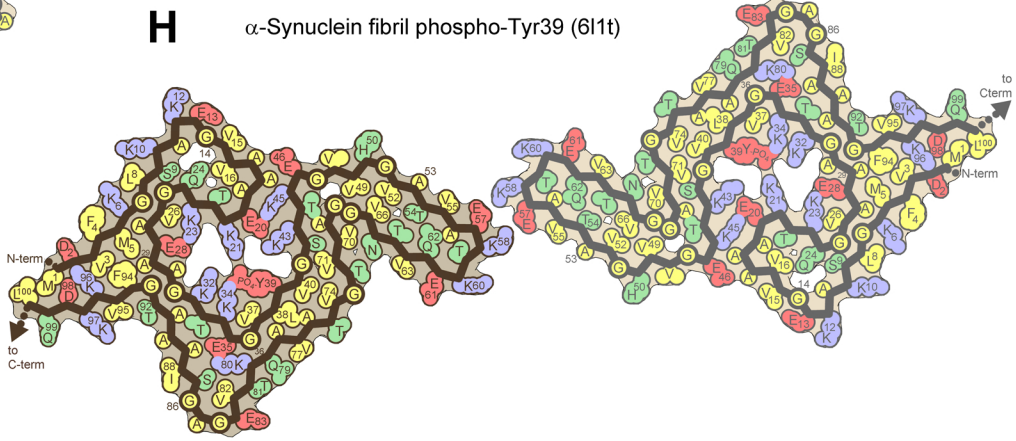

Supplement: NIHMS1739886-supplement-5.pdf [file NIHMS1739886-supplement-5.pdf]
