# Supplementary material
Source: PubMed Central journal article supplement (PMC8772536)

# TDP-43 domains

**A** TDP43-LC (286-331) A315E (6n3c)

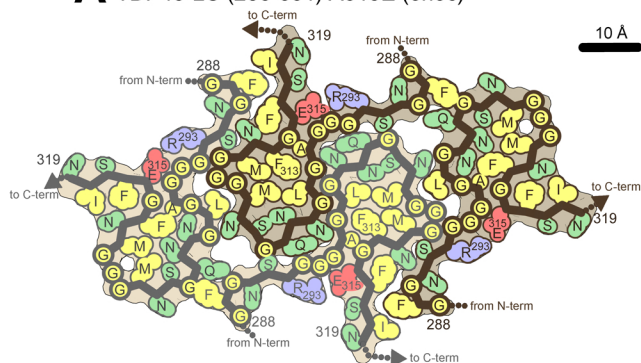

## Dagger-shaped folds

**B** TDP-43 LC (311-360) fast-symmetric polymorph (6n37)

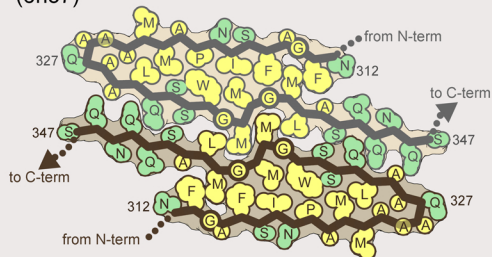

**C** TDP-43 LC (311-360) fast asymmetric polymorph (6n3b)

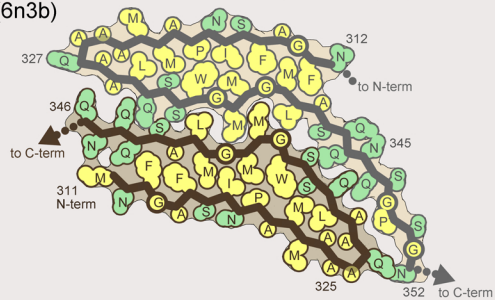

**D** TDP-43 LC (311-360) slow polymorph (6n3a)

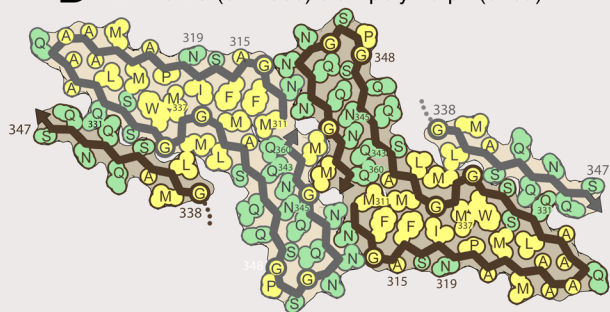

**E** TDP-43 RRM2 (247-257)(5w7v)

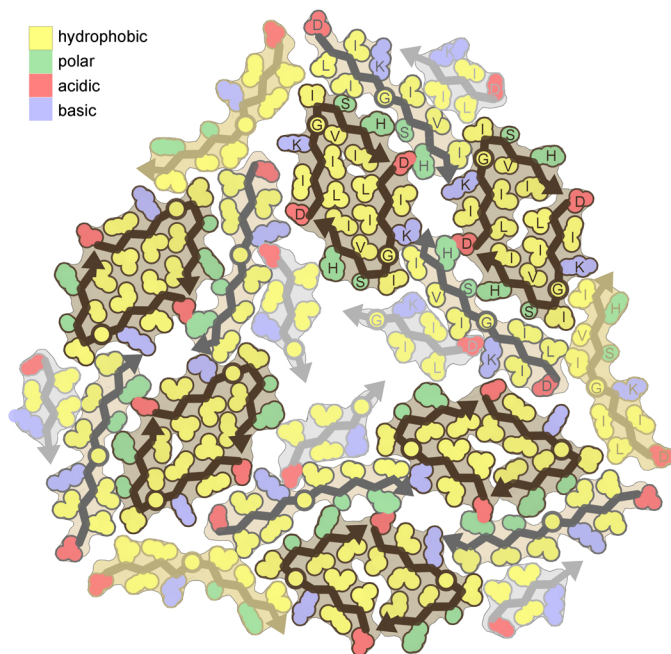

**F** TDP-43 LCD (267-414) (7kwz)

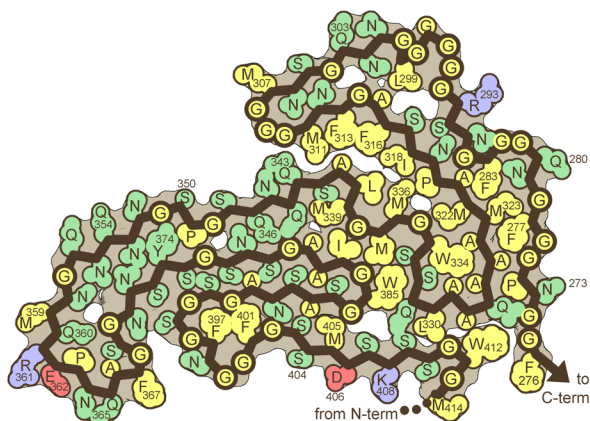

Supplement: NIHMS1739886-supplement-6.pdf [file NIHMS1739886-supplement-6.pdf]
