# Supplementary material
Source: PubMed Central journal article supplement (PMC8772536)

# Transthyretin

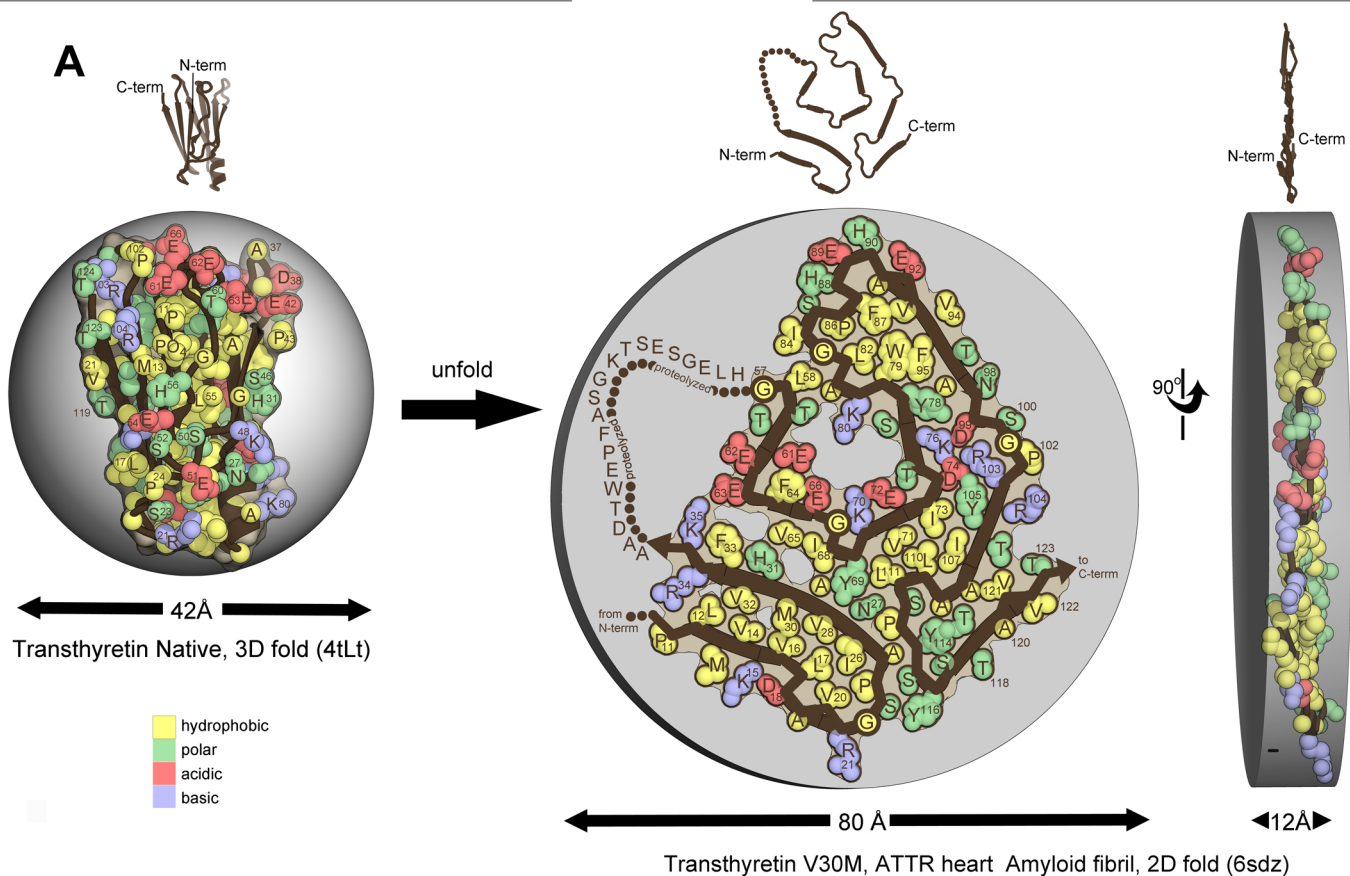

# Antibody Light Chains

**B** Antibody Light Chain  $\lambda$ 1, human heart (6ic3)

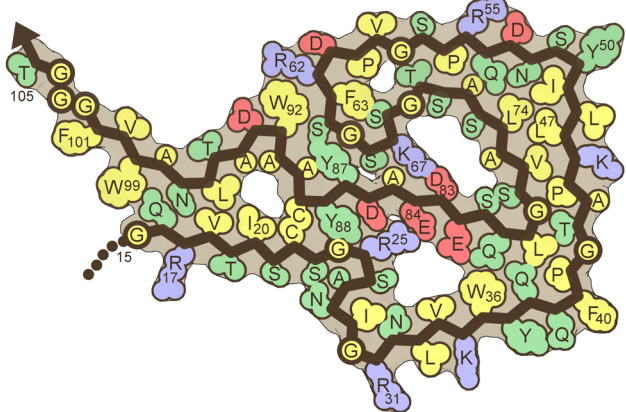

**C** Antibody Light Chain  $\lambda$ 6, human heart (6hud)

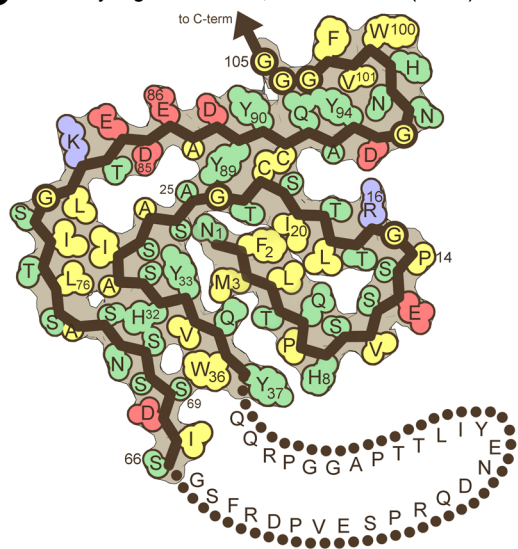

**D** Antibody Light Chain  $\lambda$ 3, human heart conformation A (6z1o)

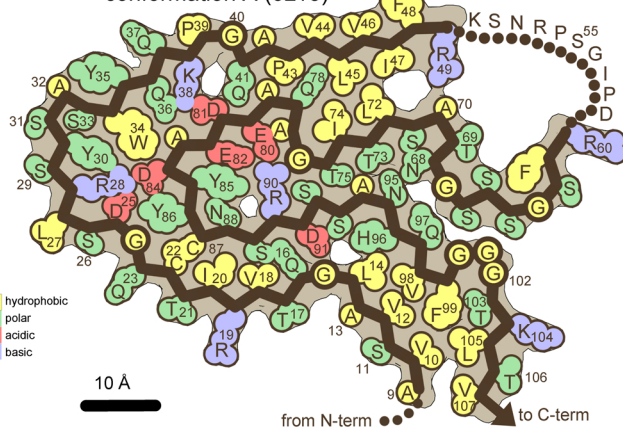

**E** Antibody Light Chain  $\lambda$ 3, human heart conformation B (6z1i)

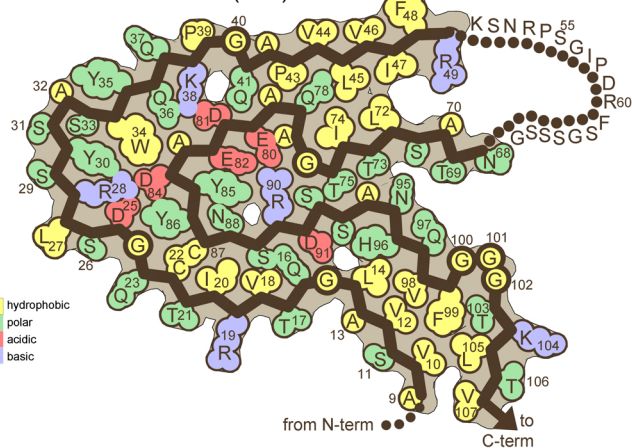

Supplement: NIHMS1739886-supplement-7.pdf [file NIHMS1739886-supplement-7.pdf]
