# Supplementary material
Source: PubMed Central journal article supplement (PMC8772536)

# Serum Amyloid A

**A** Serum Amyloid A, human (6mst)

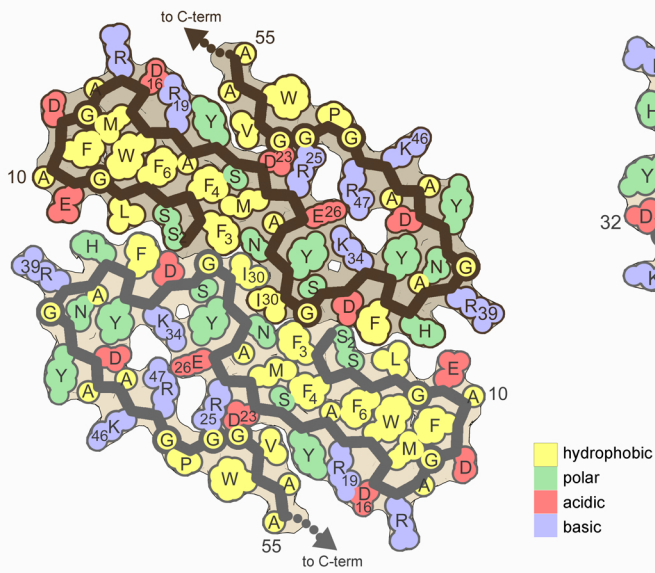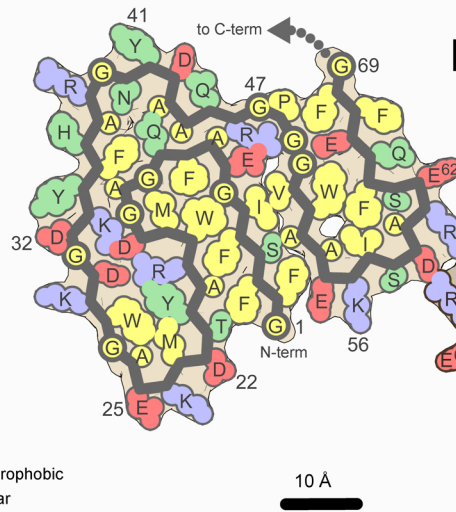

**B** Serum Amyloid A, murine (6ds0)

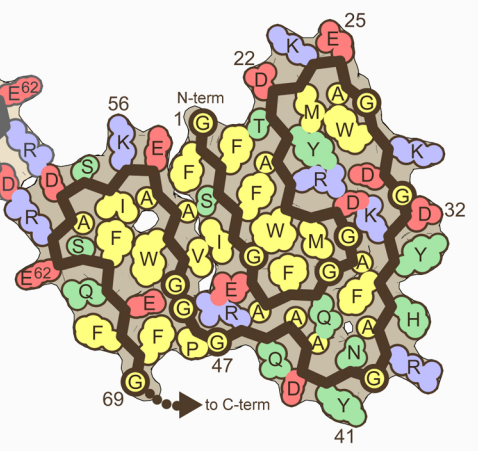

# β-2-microglobulin

**C** β-2-Microglobulin (6gk3)

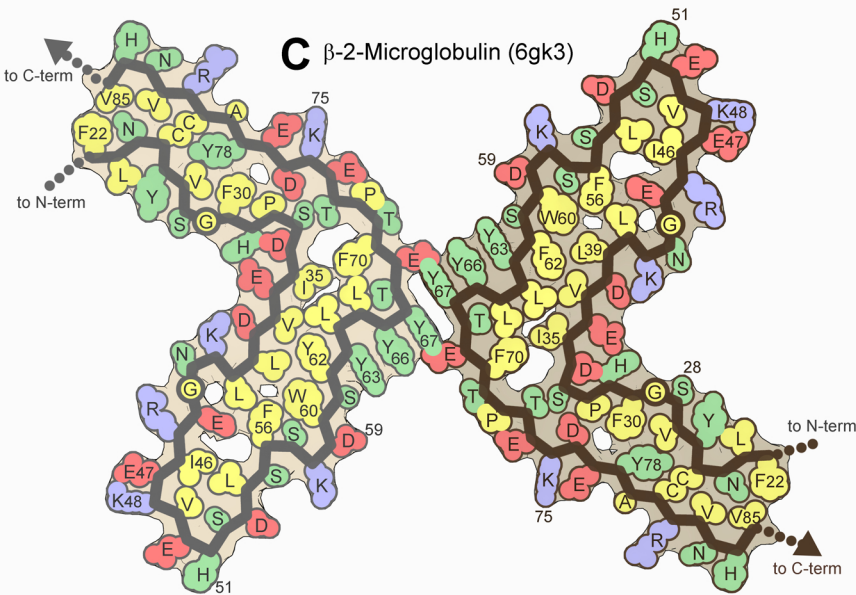

# Artificial amyloid

**D** SH3 domain of PI3-Kinase (6r4r)

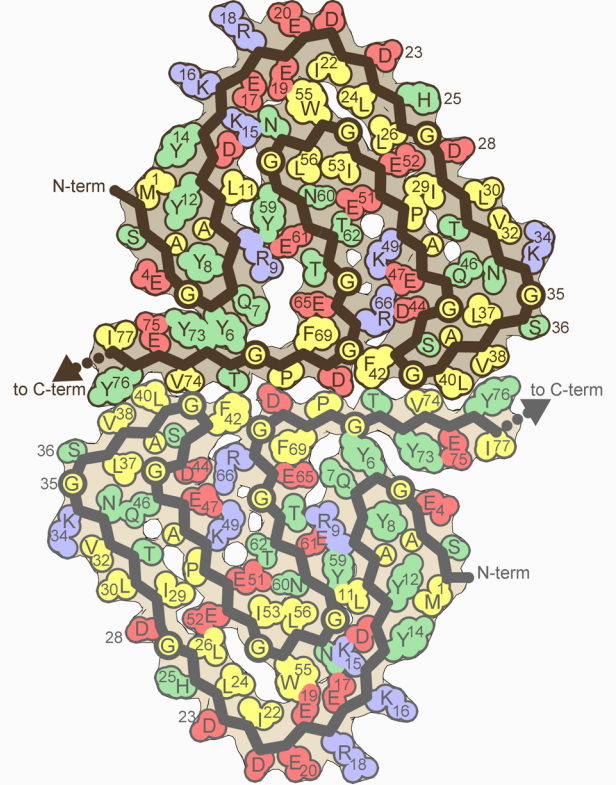

# Prions

**E** Prion Protein (94-187) human, protease resistant (6uur)

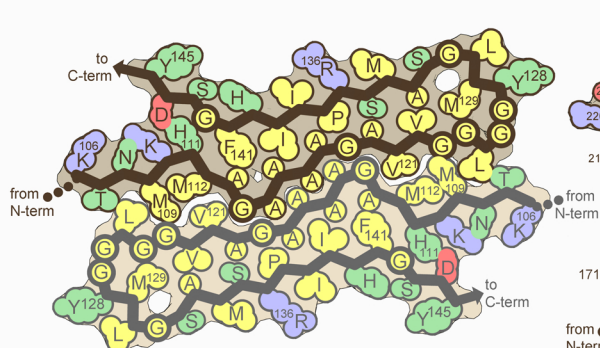

**F** Prion Protein (23-231) human (6lni)

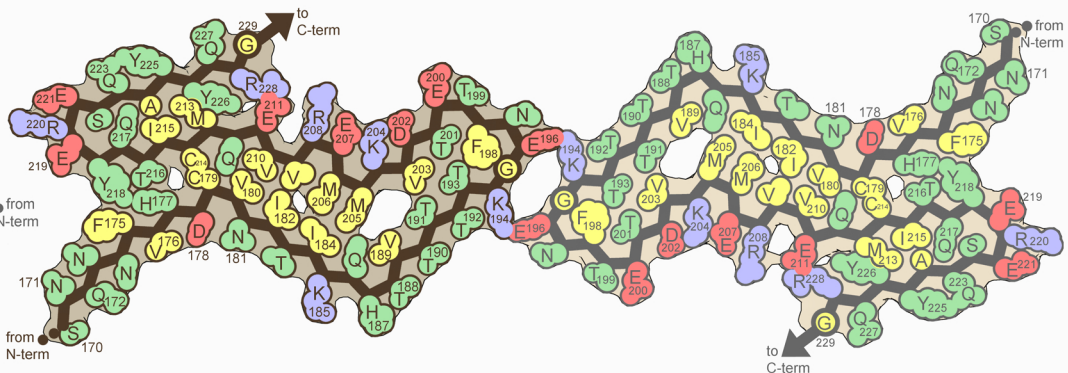

Supplement: NIHMS1739886-supplement-8.pdf [file NIHMS1739886-supplement-8.pdf]
