# Supplementary material
Source: PubMed Central journal article supplement (PMC8772536)

### Backbone Torsional Frustration

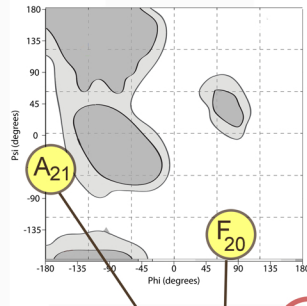

potentially alleviated by:  
A21G,  
E22G,  
or E22Δ

### A Amyloid β(1-42) (2nao)

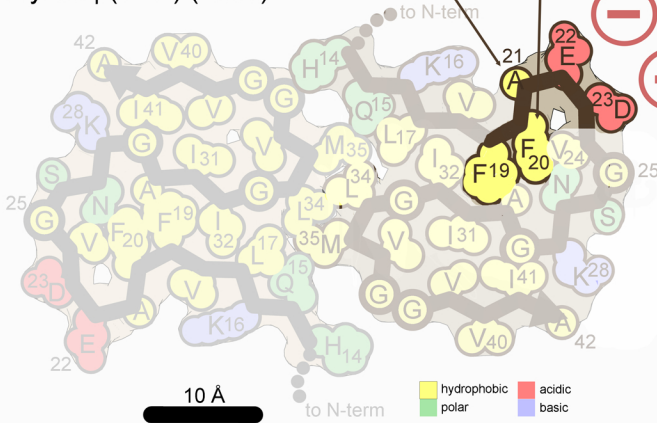

Charge Frustration

potentially alleviated by:  
E22Q,  
E22G,  
E22K,  
E22Δ,  
or D23N

### B α-synuclein MSA case 2 Type II-1 (6xyp)

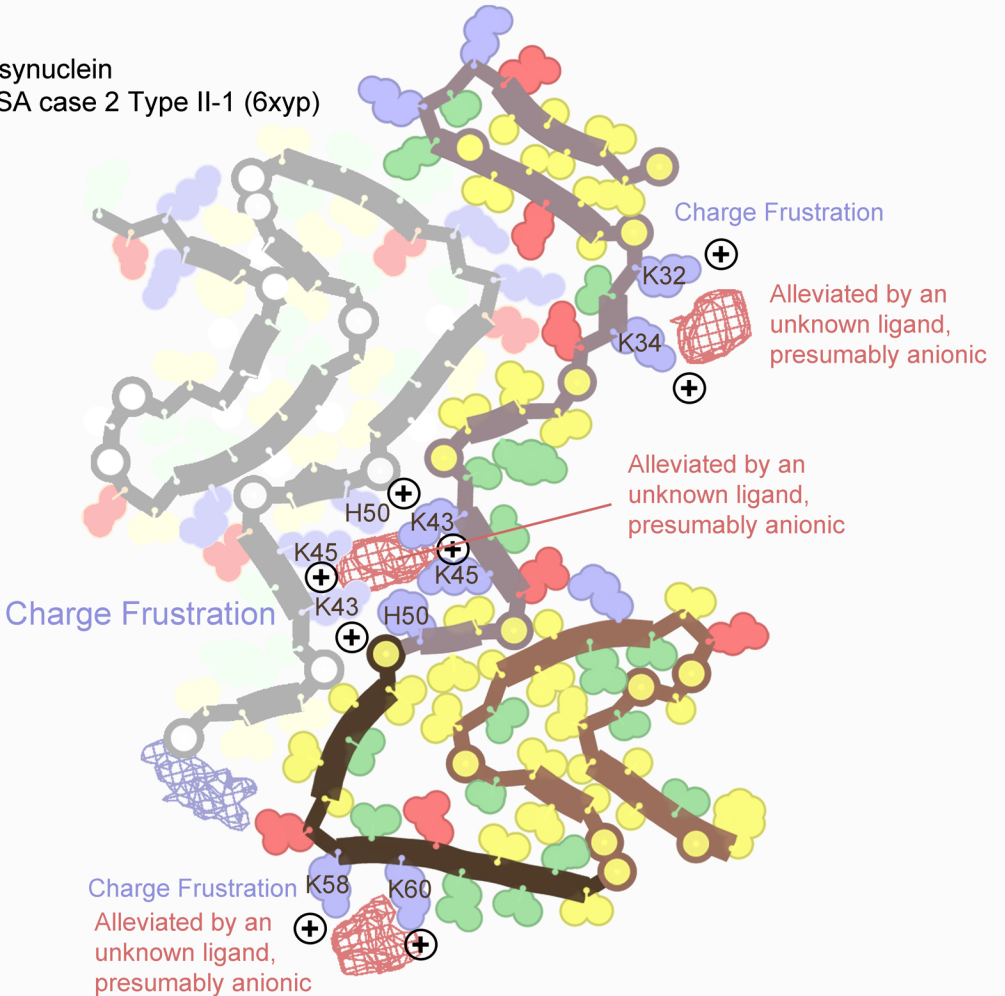

Supplement: NIHMS1739886-supplement-11.pdf [file NIHMS1739886-supplement-11.pdf]
