# Supplementary material
Source: PubMed Central journal article supplement (PMC8772536)

- Evaluate solvent accessible surface area (SASA) of a central strand within an amyloid fibril (Folded state).
- Evaluate SASA of isolated, extended strand using an approximation (Reference state). That is, for residue  $n$ , evaluate SASA for the isolated tripeptide in the absence of side chains on  $n-1$  and  $n+1$ .
- Take the difference,  $SASA_{\text{Ref}} - SASA_{\text{Fold}}$  for each atom to get area buried.
- Multiply the area buried by the Atomic Solvation Parameter (ASP).

+18 cal/mol/Å<sup>2</sup> for C  
 -5 cal/mol/Å<sup>2</sup> for S  
 -9 cal/mol/Å<sup>2</sup> for N,O uncharged  
 -38, -37 cal/mol/Å<sup>2</sup> for N,O charged

Except in the following cases:

1. ASP=0 for **Asn** or **Gln** side chains N and O elements with two-H-bonds **and less than 5 Å<sup>2</sup> SASA**.
  2. ASP=0 for backbone N and O elements involved in H-bond.
  3. ASP>-9 for ionizable N or O elements involved in ic pair **and less than 50 Å<sup>2</sup> SASA**. Ion pair distance must be **less than 4.5 Å**. ASP depends on distance as follows: A.S.P. = -9 \* ((dist-2.8Å)/2.8Å)<sup>2</sup>.
  4. Include entropy terms from Koehl & Delarue 1994 scaled by percentage of side chain surface area buried.
- Sum up the energies of all the atoms to get the solvation energy. Negate this value to get stabilization energy.
  - Less sensitive to structural errors than Rosetta.

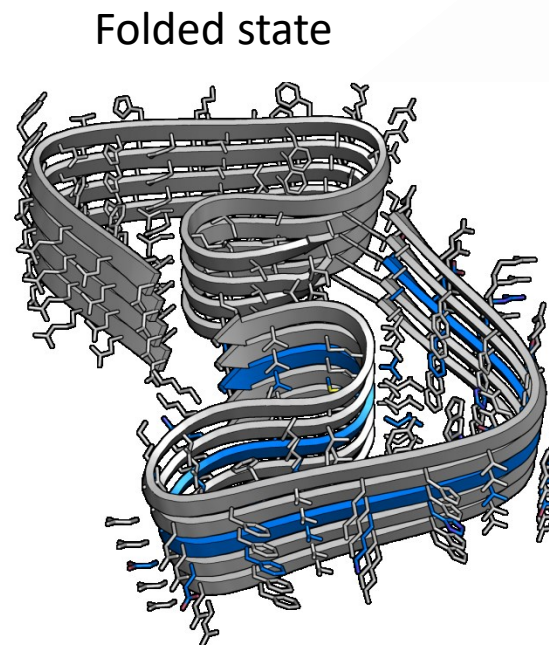

Reference state

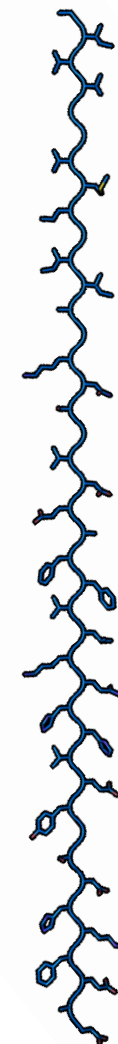

Supplement: NIHMS1739886-supplement-12.pdf [file NIHMS1739886-supplement-12.pdf]
