# Supplementary material
Source: PubMed Central journal article supplement (PMC8772536)
Supplement: NIHMS1739886-supplement-13.pdf [file NIHMS1739886-supplement-13.pdf]

|                                    |                  |     |                                 |    |                       |   |      |      |     |    |         |      |             |       |       |      |
|------------------------------------|------------------|-----|---------------------------------|----|-----------------------|---|------|------|-----|----|---------|------|-------------|-------|-------|------|
| TDP43 LC (286-331) A315E           | 288-319          | 32  | "R", kinked                     | 4  | 2-fold screw          | 1 | -1.3 | 4.81 | 1.2 | 10 | cryoEM  | 3.3  | Recombinant | -17.0 | -0.53 | 6n3c |
| TDP43 LC (311-360) slow            | 311-360, 338-347 | 50  | Dagger                          | 4  | 2-fold                | 1 | -0.6 | 4.85 | 0.9 | 6  | cryoEM  | 3.3  | Recombinant | -18.8 | -0.38 | 6n3a |
| TDP43 LC (311-360) fast sym        | 312-347          | 36  | Dagger                          | 2  | 2-fold screw          | 1 | -2.8 | 4.75 | 1.0 | 13 | cryoEM  | 3.8  | Recombinant | -17.1 | -0.47 | 6n37 |
| TDP43 LC (311-360) fast asym       | 312-352, 311-346 | 41  | Dagger                          | 2  | asymm. pair           | n | -2.3 | 4.81 | 0.9 | 8  | cryoEM  | 3.8  | Recombinant | -17.6 | -0.49 | 6n3b |
| TDP43 LC (267-414)                 | 276-414          | 139 | Meander                         | 1  | asymmetric            | n | -1.7 | 4.73 |     |    | cryoEM  | 3.2  | Recombinant | -51.7 | -0.37 | 7kwz |
| TDP43(247-257)                     | 247-257          | 11  | "L", straight, & curved         | 27 | 3-fold screw          | n | -1.2 | 4.80 | 0.2 | 12 | cryoEM  | 3.7  | Synthetic   | -10.7 | -0.97 | 5w7v |
| Transthyretin                      | 11-35, 57-123    | 92  | Spearhead                       | 1  | single                | n | -1.2 | 4.83 | 1.3 | 3  | cryoEM  | 3.0  | Human heart | -62.1 | -0.68 | 6sdz |
| <b>Functional Amyloid Proteins</b> |                  |     |                                 |    |                       |   |      |      |     |    |         |      |             |       |       |      |
| FUS LC domain (1-214)              | 37-97            | 61  | "S", highly kinked              | 1  | single                | 0 | 0.0  | 4.89 | 1.2 | 4  | ssNMR   | 2.7  | Recombinant | -12.2 | -0.20 | 5w3n |
| FUS LC domain (111-214)            | 112-150          | 39  | "U"                             | 2  | 2-fold screw          | 1 | -2.1 | 4.88 |     |    | cryoEM  | 2.6  | Recombinant | -7.3  | -0.19 | 6xfm |
| FUS LC domain SYSGYS               | 37-42            | 6   | Kinked                          | 2  | 2-fold screw          | 1 | 0.0  | 4.82 | 0.2 | 2  | X-ray   | 1.1  | Synthetic   | -3.6  | -0.30 | 6bwz |
| FUS LC domain SYSSYGQS             | 54-61            | 8   | Kinked                          | 2  | 2-fold screw          | 1 | 0.0  | 4.79 | 0.8 | 8  | X-ray   | 1.1  | Synthetic   | -3.6  | -0.22 | 6bxv |
| FUS LC domain STGGYG               | 77-82            | 6   | Kinked                          | 2  | 2-fold screw          | 4 | 0.0  | 4.93 | 0.6 | 13 | X-ray   | 1.1  | Synthetic   | -5.0  | -0.41 | 6bzb |
| NUP98 LCD GFGNFGTS                 | 116-123          | 8   | Kinked                          | 2  | 2-fold screw          | 1 | 0.0  | 4.79 | 0.6 | 14 | crystal | 0.9  | Synthetic   | -9.4  | -0.59 | 6bzm |
| glucagon                           | 1-29             | 29  | Straight, antiparallel          | 2  | 2-fold screw          | 8 | -2.2 | 9.64 | 0.4 | 8  | ssNMR   | 1.5  | Synthetic   | -5.0  | -0.17 | 6nzn |
| hnRNPA1 LCD GYNGFG                 | 243-248          | 6   | Kinked                          | 2  | 2-fold screw          | 1 | 0.0  | 4.77 | 0.3 | 17 | crystal | 1.1  | Synthetic   | -6.3  | -0.52 | 6bxx |
| hnRNPA1                            | 251-294          | 45  | "S"                             | 2  | 2-fold screw          | 1 | -1.9 | 4.74 |     |    | cryoEM  | 2.8  | Recombinant | -23.2 | -0.52 | 7bx7 |
| hnRNPA2                            | 263-319          | 57  | Kinked                          | 1  | single                | 1 | -2.9 | 4.81 |     |    | cryoEM  | 3.1  | Recombinant | -21.4 | -0.38 | 6wgk |
| HET-s(218-289)                     | 224-283          | 60  | $\beta$ -helix, 2-turn solenoid | 1  | single $\beta$ -helix | 0 | -8.0 | 9.48 | 2.8 | 12 | ssNMR   | 1.5  | Recombinant | -18.8 | -0.30 | 2znm |
| Orb2                               | 276-206          | 31  | "U"                             | 3  | 3-fold                | 0 | -1.6 | 4.75 |     |    | cryoEM  | 2.6  | Fly brain   | +0.8  | +0.03 | 6vps |
| RIPK1-RIPK3                        | 448-462, 532-549 | 33  | "S"                             | 2  | 2-fold screw          | 1 | -4.8 | 10.1 | 0.6 | 4  | ssNMR   | poor | Recombinant | -5.7  | -0.35 | 5v7z |
| $\beta$ -endorphin                 | 1-31             | 31  | "U"                             | 1  | Single                | n |      |      |     |    | ssNMR   |      | Recombinant | -16.8 | -0.54 | 6tub |

% Symmetry Classes are defined in Eisenberg, D. S. & Sawaya, M. R. Structural Studies of Amyloid Proteins at the Molecular Level. *Annu. Rev. Biochem.* **86**, 69–95 (2017).

<sup>§</sup> Negative values indicate left handed twists. Positive values indicate right handed twists.

\* Average RMSD over all pairwise superimpositions of N models, using only non-hydrogen atoms of the centermost chain of the fibril assembly.

# The NMR restraints were of such good quality that only a single model was reported.

@ See comment of Wälti et al. 2016, page E4981.

& Planes are least-squares fitted to alpha carbon atom positions of a chain. RMS deviations are reported from this plane, estimating warpedness. Planes are within 20° of normal to the fibril axis with rare exceptions.

^References to screw axes are actually pseudo screw axis.

Supplementary Table 2. Notable Examples of Frustrated Regions and Their Alleviation

| fibril                                             | PDB ID code | Backbone torsional frustration |                                 | Charge Frustration                |                                       |                                 |        | Cavities/ Channels                |                                       |
|----------------------------------------------------|-------------|--------------------------------|---------------------------------|-----------------------------------|---------------------------------------|---------------------------------|--------|-----------------------------------|---------------------------------------|
|                                                    |             | Strain                         | Relief                          | Adjacent ladders of like-charge   |                                       | Ladders of uncompensated charge |        | Strain                            | relief                                |
|                                                    |             |                                |                                 | Strain                            | Relief                                | Strain                          | Relief |                                   |                                       |
| A $\beta$ (1-42)                                   | 5kk3        | F19-F20-A21-D22-E23            | A21G, E22G, E22 $\Delta$ , D23N | E22, D23                          | E22Q, E22G, E22K, E22 $\Delta$ , D23N |                                 |        |                                   |                                       |
| transthyretin                                      | 6sdz        | V16-V17, L110-L111             |                                 | E66                               |                                       |                                 |        | Near K70 & K80                    |                                       |
| $\beta$ -2-microglobulin                           | 6gk3        | L64-L65                        |                                 |                                   |                                       |                                 |        |                                   |                                       |
| Islet amyloid polypeptide                          | 6vw2        | S19-S20                        | S20G                            |                                   |                                       |                                 |        |                                   |                                       |
| antibody light chain $\lambda$ 6                   | 6hud        | A35-I36                        |                                 |                                   |                                       |                                 |        |                                   |                                       |
| antibody light chain $\lambda$ 1                   | 6ic3        |                                |                                 |                                   |                                       | E82                             |        | Three cavities: A, B, & C.        | Apolar ligand in cavity C, near Ile20 |
| serum amyloid A, mouse                             | 6dso        | M16-W17, T21-D22               |                                 |                                   |                                       |                                 |        |                                   |                                       |
| serum amyloid A, human                             | 6mst        | A27-N28                        |                                 |                                   |                                       | D43                             |        | Near D43                          |                                       |
| $\alpha$ -synuclein in vitro                       | 6h6b        |                                |                                 | K43, K45, K58                     | phosphate                             | E61                             |        | Between A56 & G73                 |                                       |
| $\alpha$ -synuclein ex vivo, MSA case 2            | 6xyp        |                                |                                 | K43, K45, K58; K32, K34; K58, K60 | Unknown ligands, presumably anionic   | E61                             |        | Near K43, K45, K58                | Unknown ligand, presumably anionic    |
| $\alpha$ -synuclein Y39-PO <sub>4</sub> , in vitro | 6l1t, 6l1u  |                                |                                 | K21, K32, K34, K43                | Y39 phosphorylation                   |                                 |        | K21, K32, K34, K43                | Y39 Phosphorylation                   |
| tau straight filament, Alzheimer's                 | 5o3t, 6vi3  |                                |                                 | K321                              | K321 ubiquitination                   |                                 |        |                                   |                                       |
| tau CBD patient brain                              | 6tjo, 6tjx  |                                |                                 | K290, K294, K370                  | Unknown ligand, presumably anionic    |                                 |        | K290, K294, K370                  | Unknown ligand, presumably anionic    |
| tau Pick's Disease patient brain                   | 6gx5        |                                |                                 |                                   |                                       |                                 |        | Between P312 & P332               |                                       |
| tau CTE patient brain                              | 6nwp, 6nwq  |                                |                                 |                                   |                                       |                                 |        | Near V339, L344, F346, V350, I354 | Unknown ligand, presumably aliphatic  |
| Tau paired helical filament, Alzheimer's           | 5o3l, 6vhl  |                                |                                 | K317, K321                        | K321 ubiquitination                   |                                 |        |                                   |                                       |
| $\beta$ -endorphin                                 | 6tub        |                                |                                 |                                   |                                       | E8                              | Low pH |                                   |                                       |
| Glucagon                                           | 6nzn        |                                |                                 |                                   |                                       | D9, D15, D21                    | Low pH |                                   |                                       |

Supplementary Table 3. Functional amyloids

| Class                        | Protein name                                         | Function                                                                    | Organism                                  | Means of regulating assembly                                                                                                                                  | Means of initiating disassembly                                                       | Fibril lifespan estimate    | PDB ID code |
|------------------------------|------------------------------------------------------|-----------------------------------------------------------------------------|-------------------------------------------|---------------------------------------------------------------------------------------------------------------------------------------------------------------|---------------------------------------------------------------------------------------|-----------------------------|-------------|
| (i) Structural               | PMEL17                                               | Template for melanin synthesis                                              | Human                                     | Alternative splicing of PMEL17(Dean and Lee, 2020) . Processing by compartmentalized proprotein convertase(Berson et al., 2003).                              | Increase pH from 4 to 7(McGlinchey and Lee, 2017)                                     | Lifetime of cell            |             |
|                              | Curli                                                | Biofilm support                                                             | <i>Escherichia and Salmonella</i>         | Dedicated chaperone and nucleator proteins CsgB, CsgE, CsgF(Chapman et al., 2002)                                                                             | None                                                                                  | Beyond lifetime of cell     |             |
|                              | Chaplins                                             | Assist hyphae formation by modulating surface tension                       | <i>Streptomyces</i>                       | Chaplins have a sorting signal that targets them to the cell wall or secretion(Claessen et al., 2003)                                                         | None                                                                                  | Beyond lifetime of cell     |             |
|                              | Hydrophobins                                         | Assist hyphae formation by modulating surface tension                       | <i>Neurospora crassa</i>                  | Monomers are secreted to hydrophobic-hydrophilic interface to initiate assembly.(Macindoe et al., 2012)                                                       | None. Disassembly requires treatment with strong acid.                                | Beyond lifetime of cell     |             |
| (ii) Storage                 | $\beta$ -endorphin                                   | Regulates stress response and pain perception.                              | human                                     | Concentration in secretory granule at pH 5.5(Maji et al., 2009).                                                                                              | Release into blood with pH increase to 7(Maji et al., 2009)(Nespovitaya et al., 2016) | Less than lifetime of cell. | 6tub        |
|                              | Glucagon                                             | Regulates the conversion of glycogen to glucose                             | Human                                     | Fibrils nucleate upon pH drop, enabling storage in secretory granules(Maji et al., 2009).                                                                     | Not known.                                                                            | Less than lifetime of cell. | 6zn         |
|                              | FUS, hnRNP1, hnRNP2, etc.                            | Formation of stress granules, suppression of transcription during stress    | human                                     | Induced by stress.                                                                                                                                            | Karyopherin- $\beta$ 2 binds the nuclear localization sequence(Guo et al., 2018).     | Less than lifetime of cell. | 5w3n        |
| (iii) Information carrier    | HET-s prion                                          | Immune system, signal heterokaryon incompatibility                          | <i>Podospora anserina</i>                 | Species-specific machinery not required(Taneja et al., 2007).                                                                                                 | Perhaps chaperones like GroEL(Wälti et al., 2017)                                     | Beyond lifetime of cell.    | 2nm         |
|                              | Sup35, New1P, etc.                                   | Produce cryptic genetic variation in times of stress(Tuite and Serio, 2010) | <i>Saccharomyces cerevisiae</i>           | Aggregation of other prions like Rnq1(Tuite and Serio, 2010) and PIN(Villali et al., 2020)                                                                    | Chaperones like Hsp104 and Hsp70(Haslberger et al., 2010)                             | Beyond lifetime of cell     |             |
|                              | Mnemons, CPEB, Orb2                                  | Store memories                                                              | Yeast, <i>Aplysia</i> , <i>Drosophila</i> | Transient increase in protein levels signaled by a neurotransmitter like serotonin(Si et al., 2003)                                                           | Time.                                                                                 |                             | 6vps        |
| (iv) Suppression of function | Cdc19 pyruvate kinase                                | Stress granules                                                             | Yeast                                     | Oligomerization and phosphorylation protect Cdc19 from aggregation. Glucose starvation and dephosphorylation of Cdc19 induce aggregation. (Saad et al., 2017) | Glucose re-supplied.                                                                  | Less than lifetime of cell  |             |
| (v) Signaling                | Receptor-interacting protein kinases RIPK1 and RIPK3 | Signal necroptosis                                                          | Human                                     | Phosphorylation of RIPK1 and RIPK3(Cho et al., 2009)                                                                                                          | Ultrastable, requires 150 mM NaOH to be disassembled (Li et al., 2012).               | Beyond lifetime of cell.    | 5v7z        |

Tau filaments assembled from all 6 brain isoforms

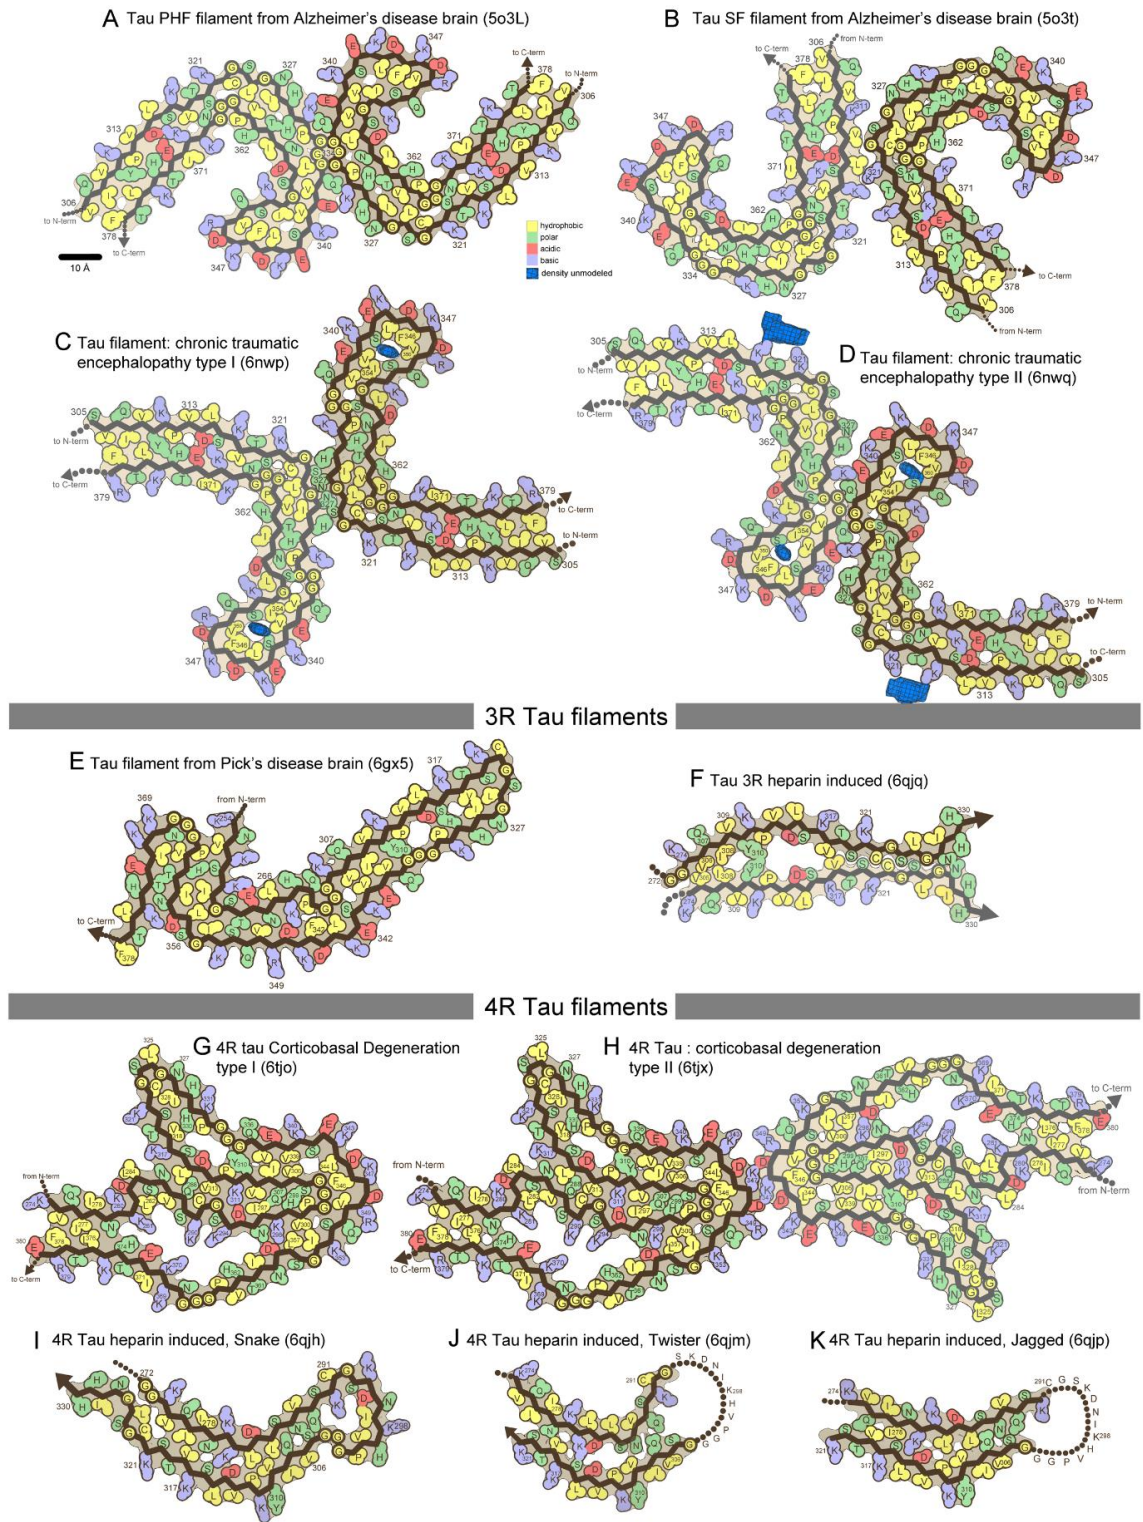

**Supplemental Figure 1. Structures of tau amyloid fibril polymorphs.** (A-D) Fibrils composed of 3R and 4R isoforms. (E-F) Fibrils composed of 3R isoforms only. (G-K) Fibrils composed of 4R isoforms only. Structures in panels A-E and G-H are from *ex vivo* fibrils. The remaining panels depict recombinant tau.

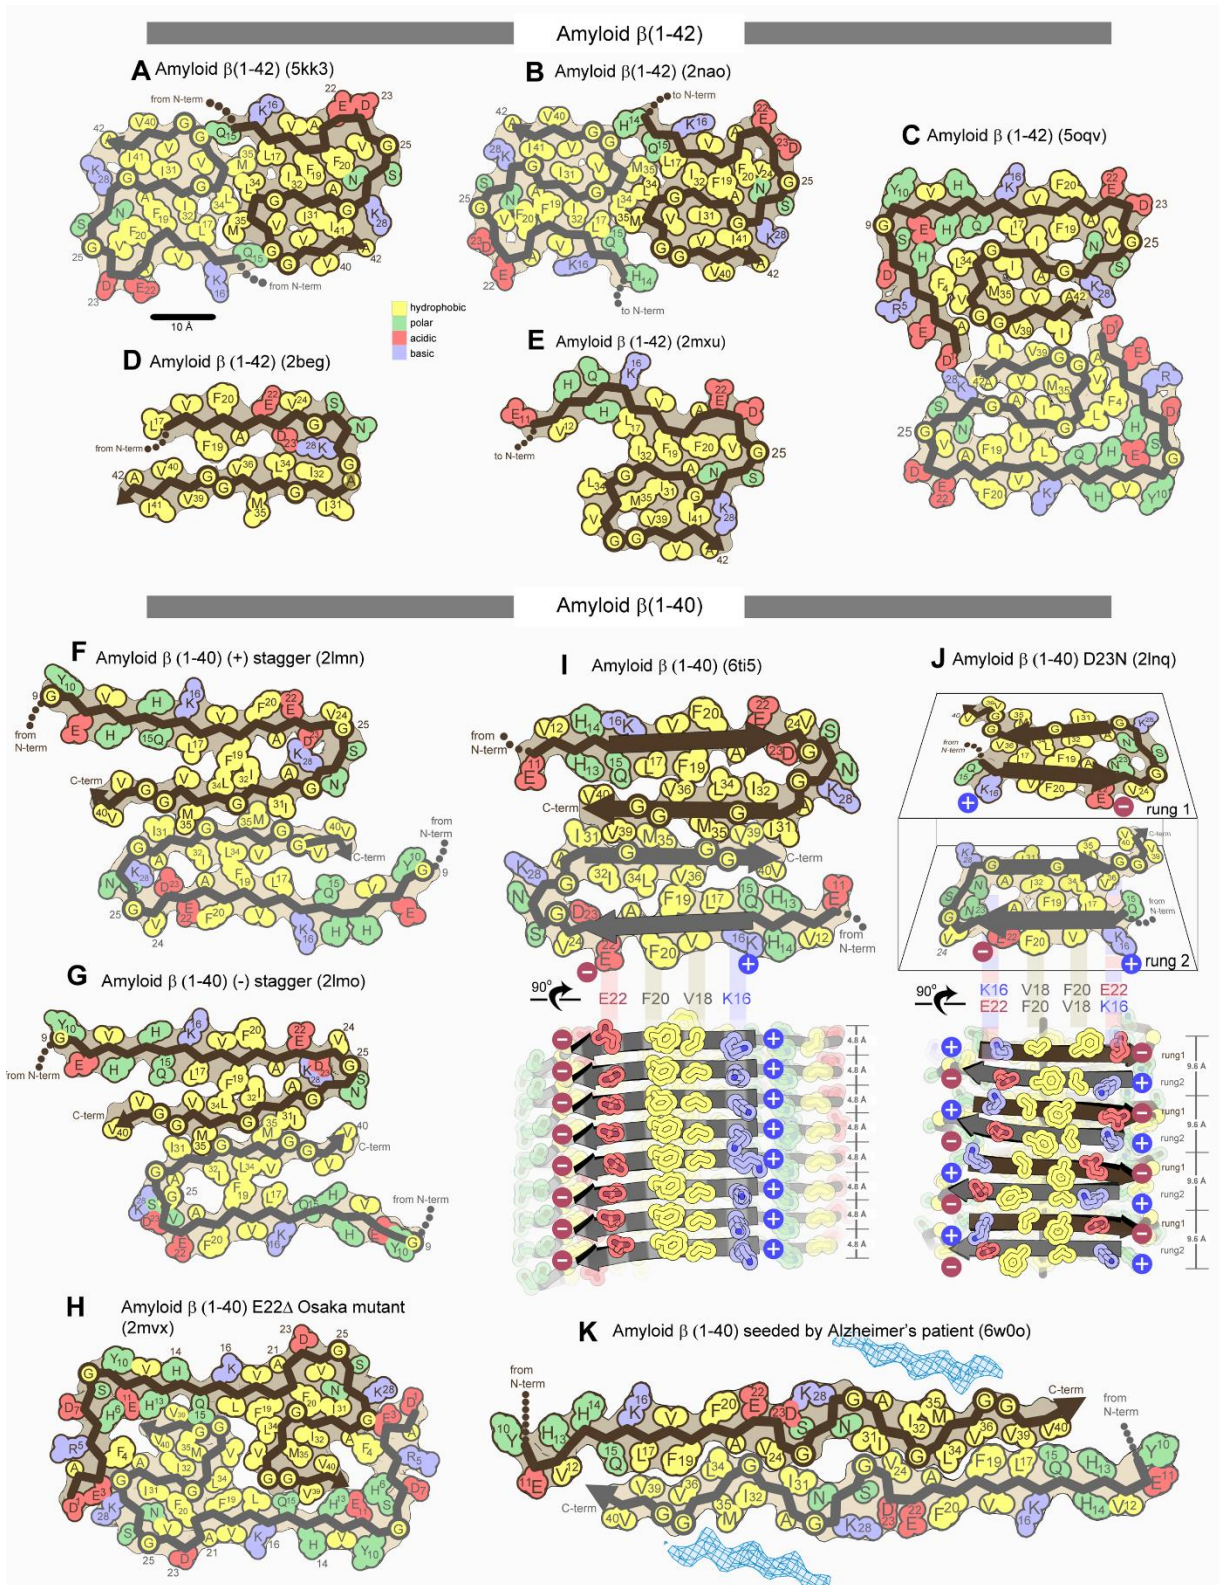

**Supplemental Figure 2. Structures of some A $\beta$  fibril polymorphs.** (A-E) 42-residue A $\beta$  isoform (F-K) 40-residue isoform of A $\beta$  (I) The parallel in-register scaffold is usual among amyloids where like-charges stack in columns. (J) A rare instance of an antiparallel  $\beta$ -sheet scaffold. Neighboring strands in the sheet run in opposite directions (brown vs. gray). Note that the antiparallel (but not the parallel) scaffold allows for charge complementation between K16 and E22.

Amyloid  $\beta$ (1-40) continued

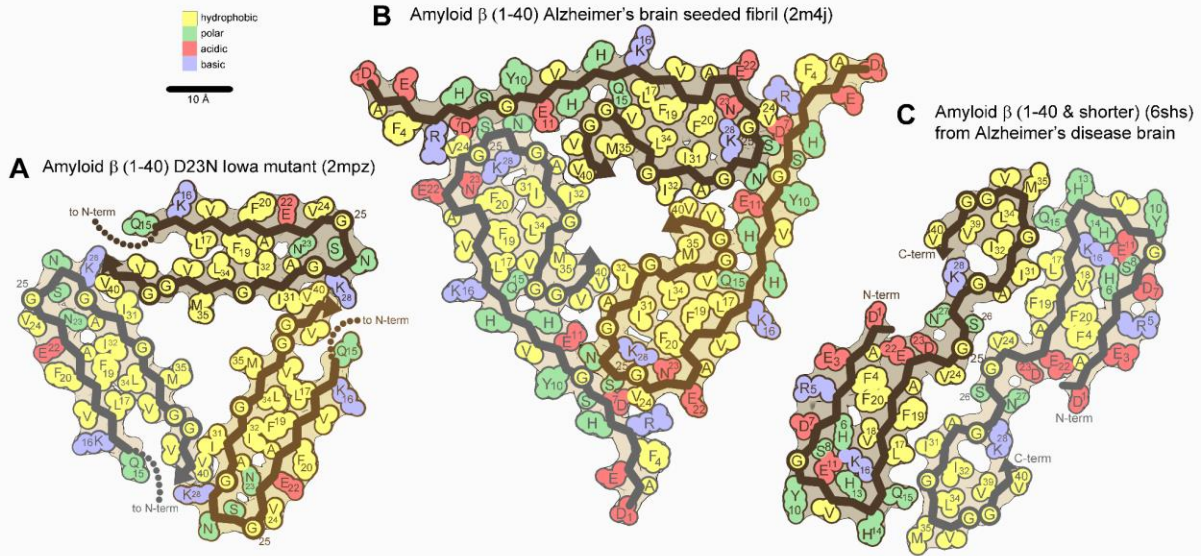

Islet Amyloid Polypeptide (IAPP)

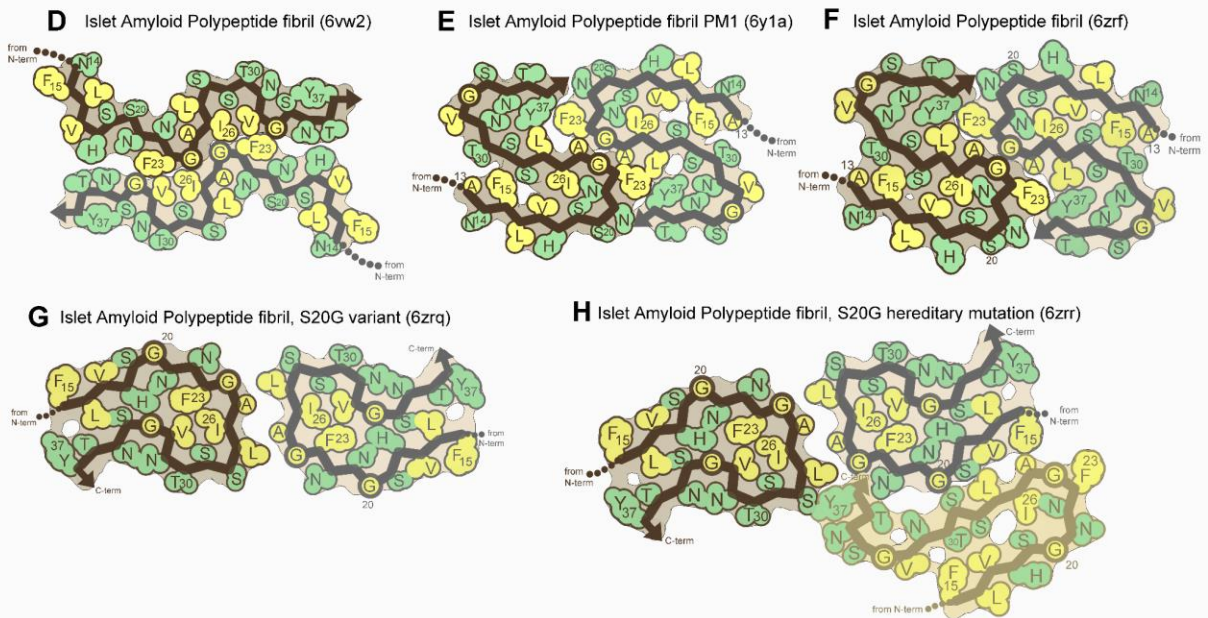

Supplemental Figure 3. Structures of  $A\beta$  fibril polymorphs (continued) and IAPP.

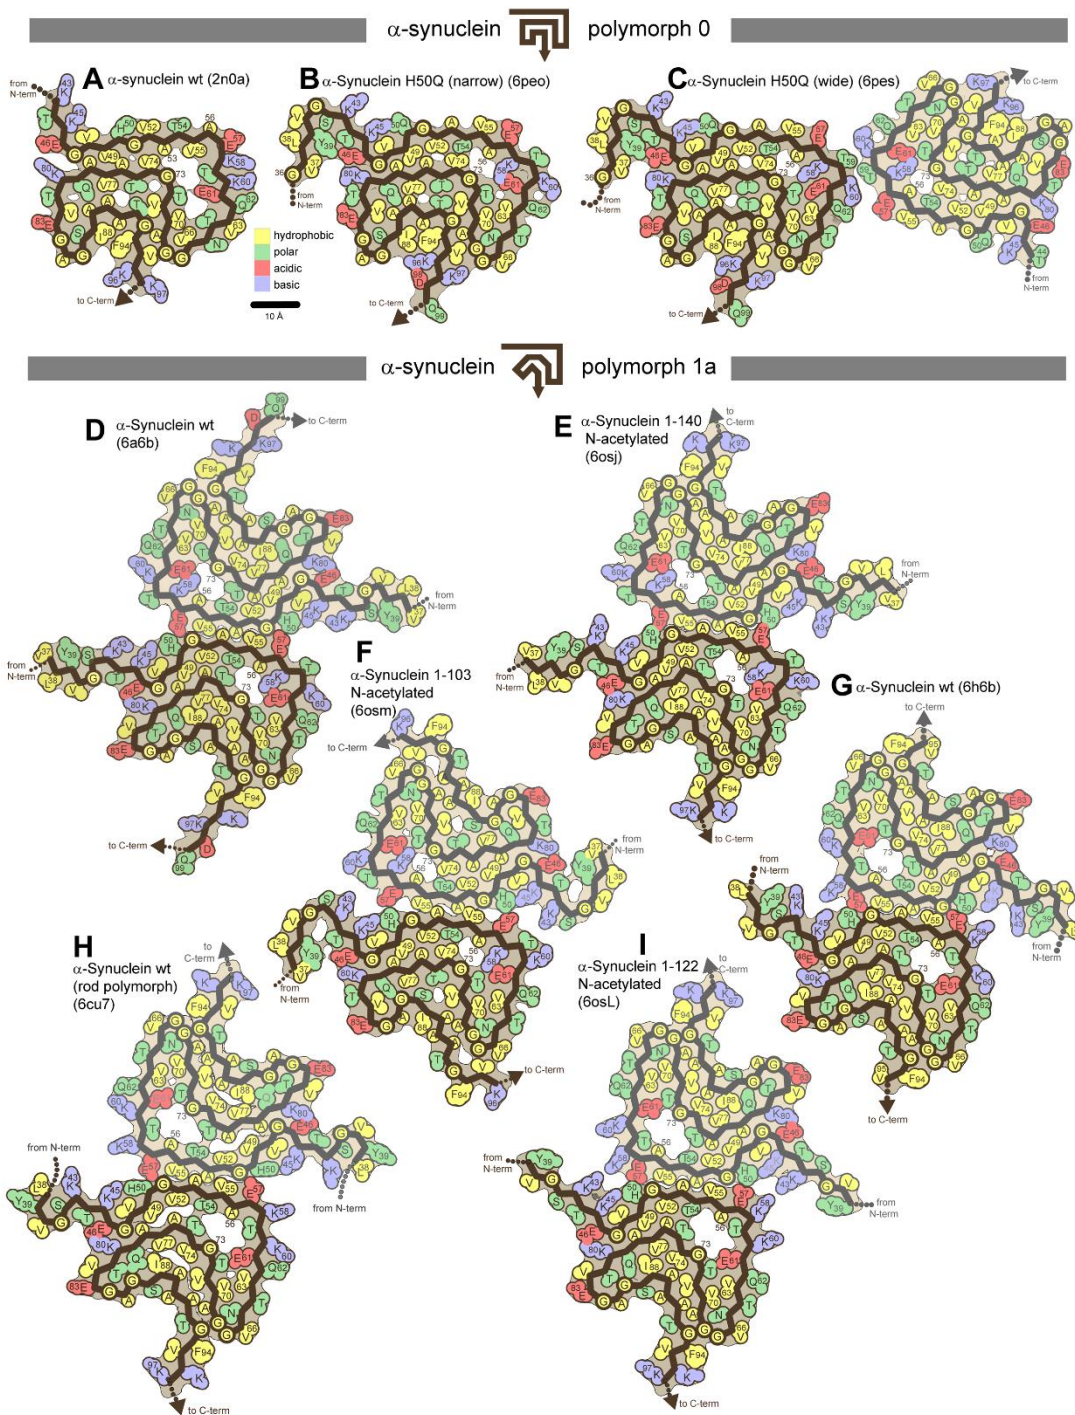

**Supplemental Figure 4. Structures of α-synuclein amyloid fibril polymorphs 0 and 1a.** Even among members of the same polymorph family, local differences in backbone conformations are observed and side chains such as K58 may be either inward or outward facing.



$\alpha$ -synuclein ex vivo

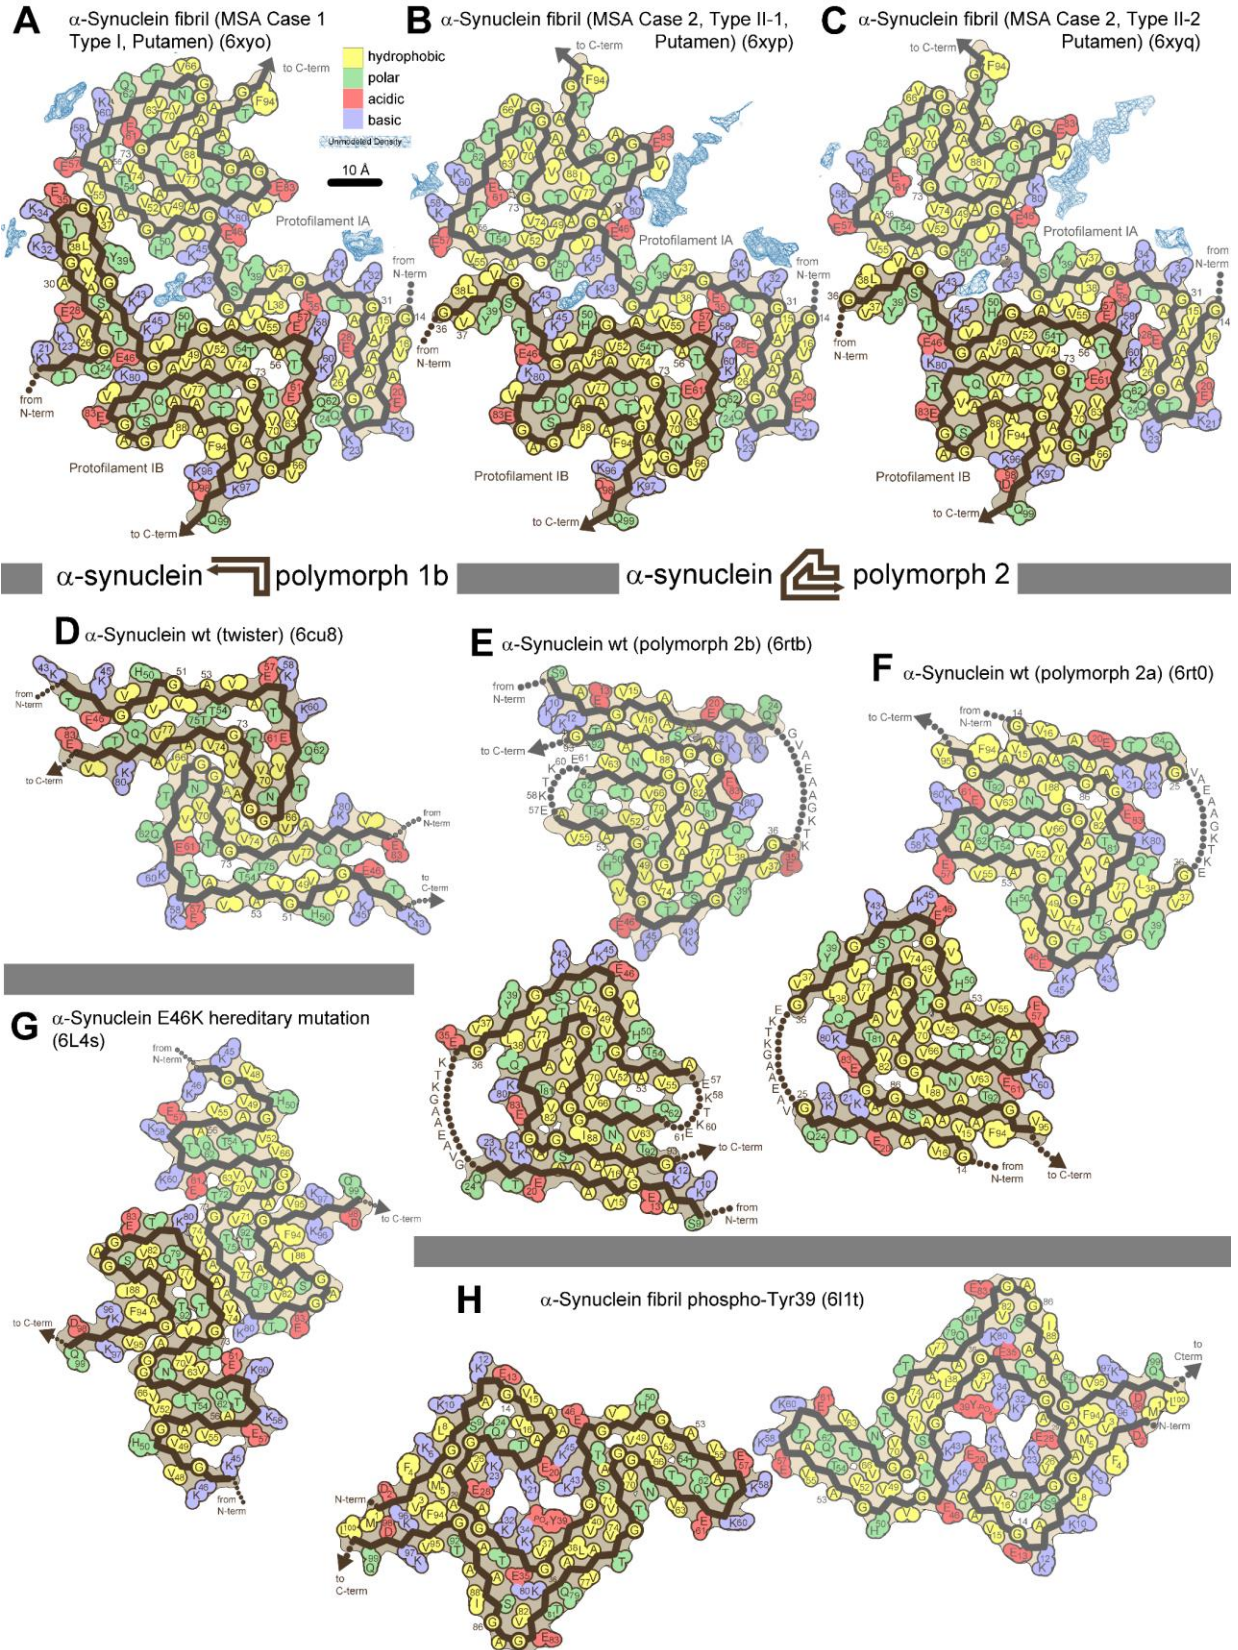

Supplemental Figure 5. Structures of  $\alpha$ -synuclein amyloid fibril polymorphs 1b, 2, and others.

TDP-43 domains

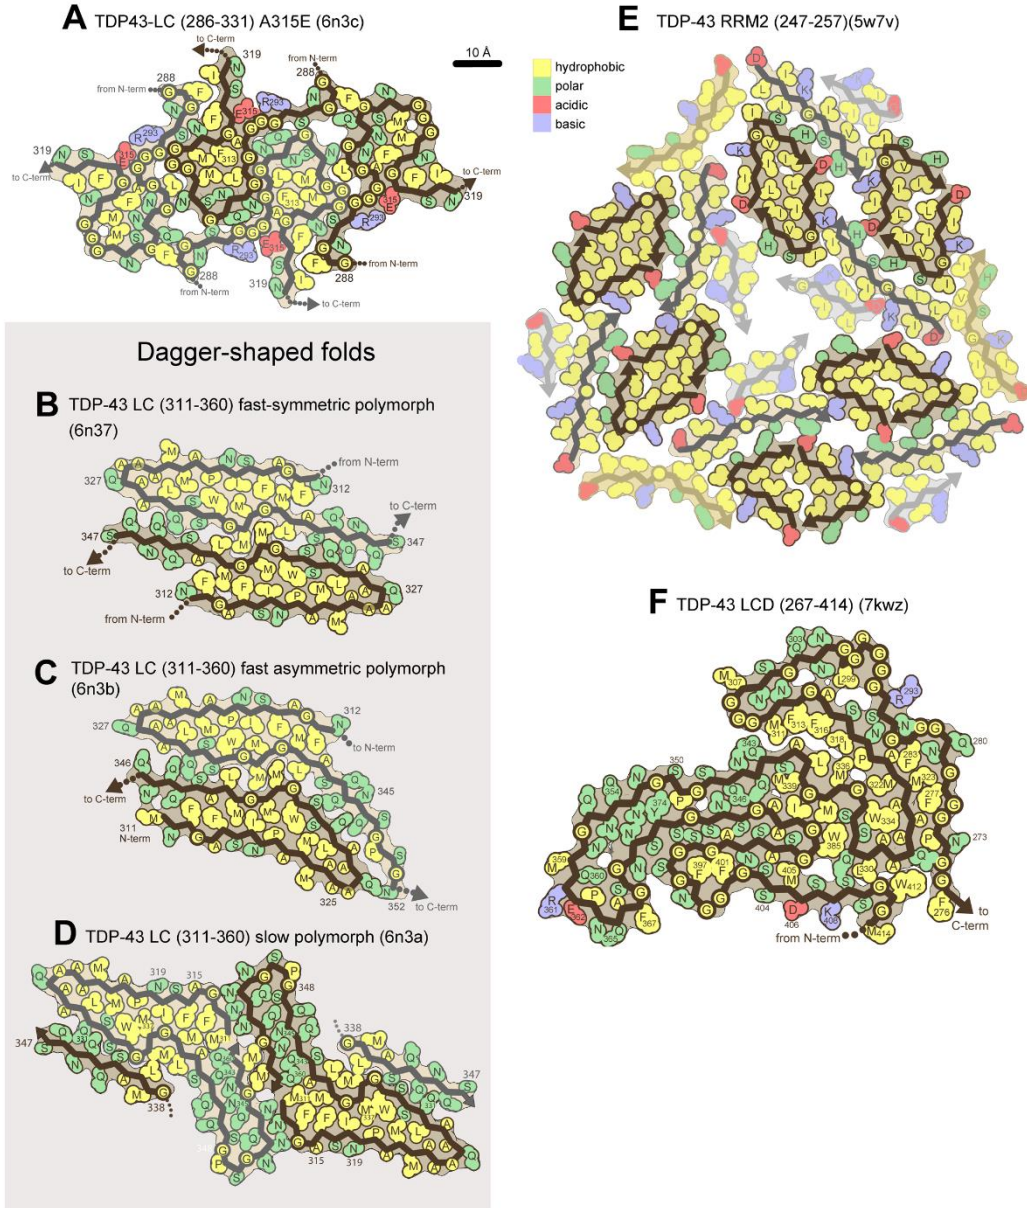

Supplemental Figure 6. Structures of TDP-43 amyloid fibrils produced with recombinant protein.

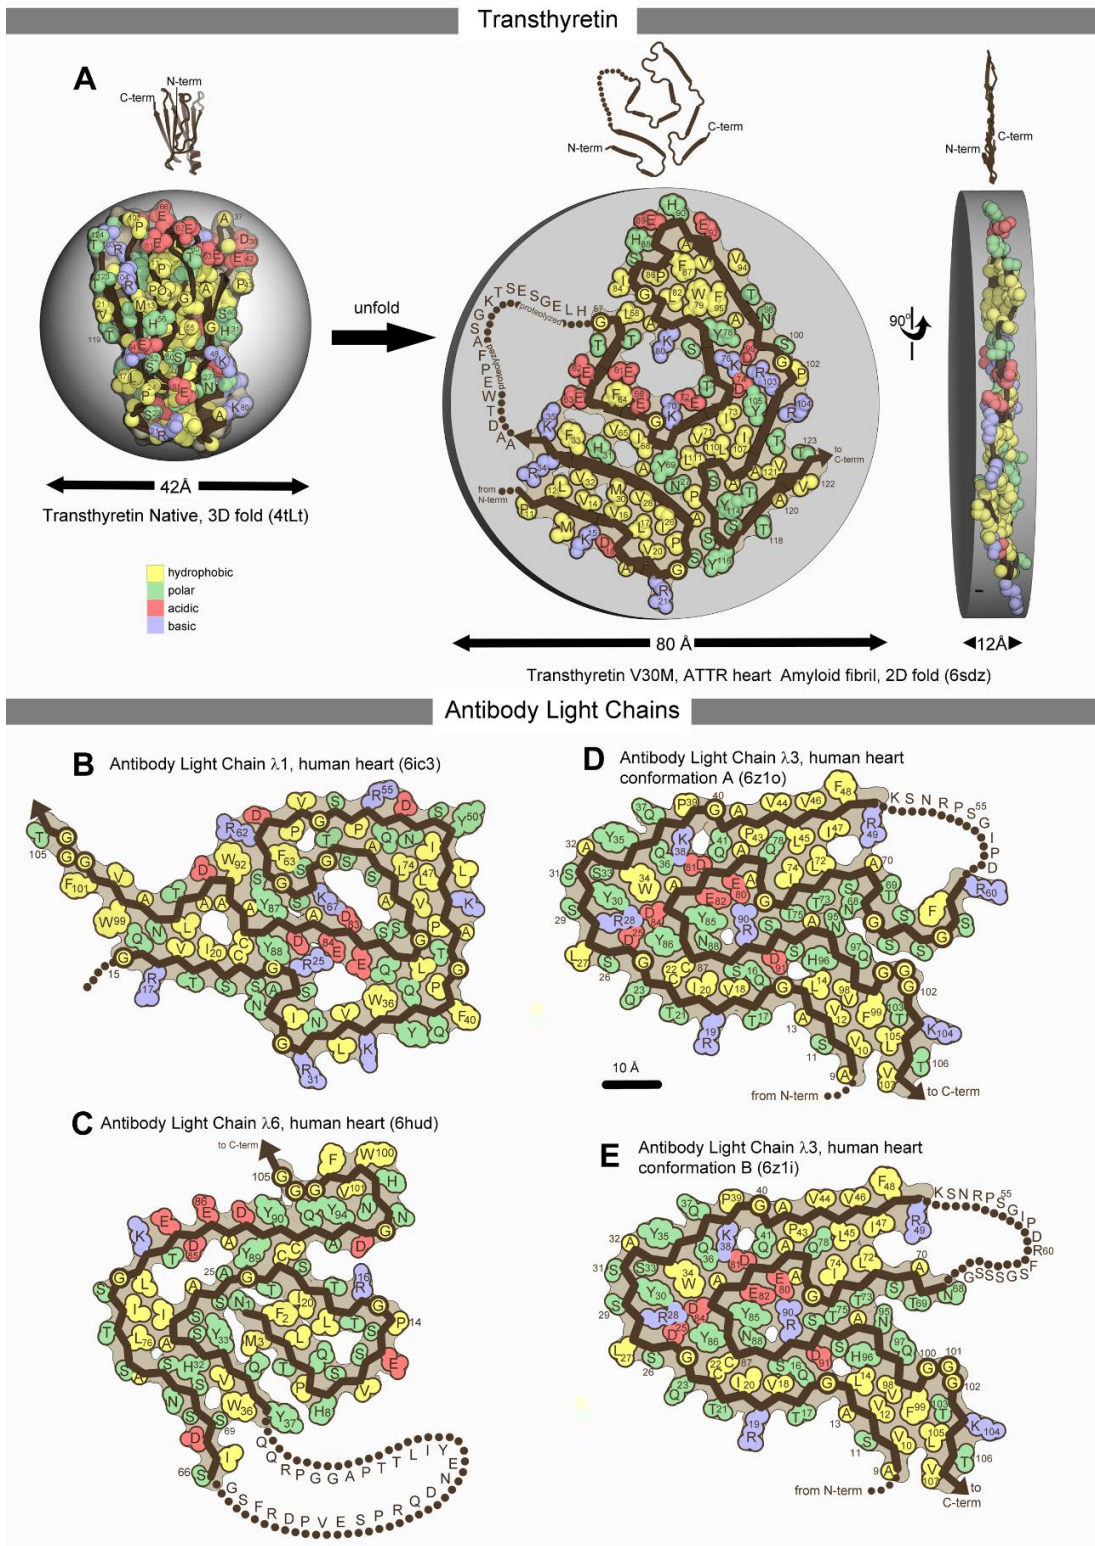

**Supplemental Figure 7. Structures of proteins involved in two systemic amyloid diseases: transthyretin amyloidosis and light chain amyloidosis.** (A) Left panel shows transthyretin in its native 3-dimensional state. The center and right panels show transthyretin in the amyloid state and highlight its confinement to a thin, nearly 2-dimensional layer. (B-D) Structures of antibody light chain amyloid fibrils extracted from patients of light chain amyloidosis.

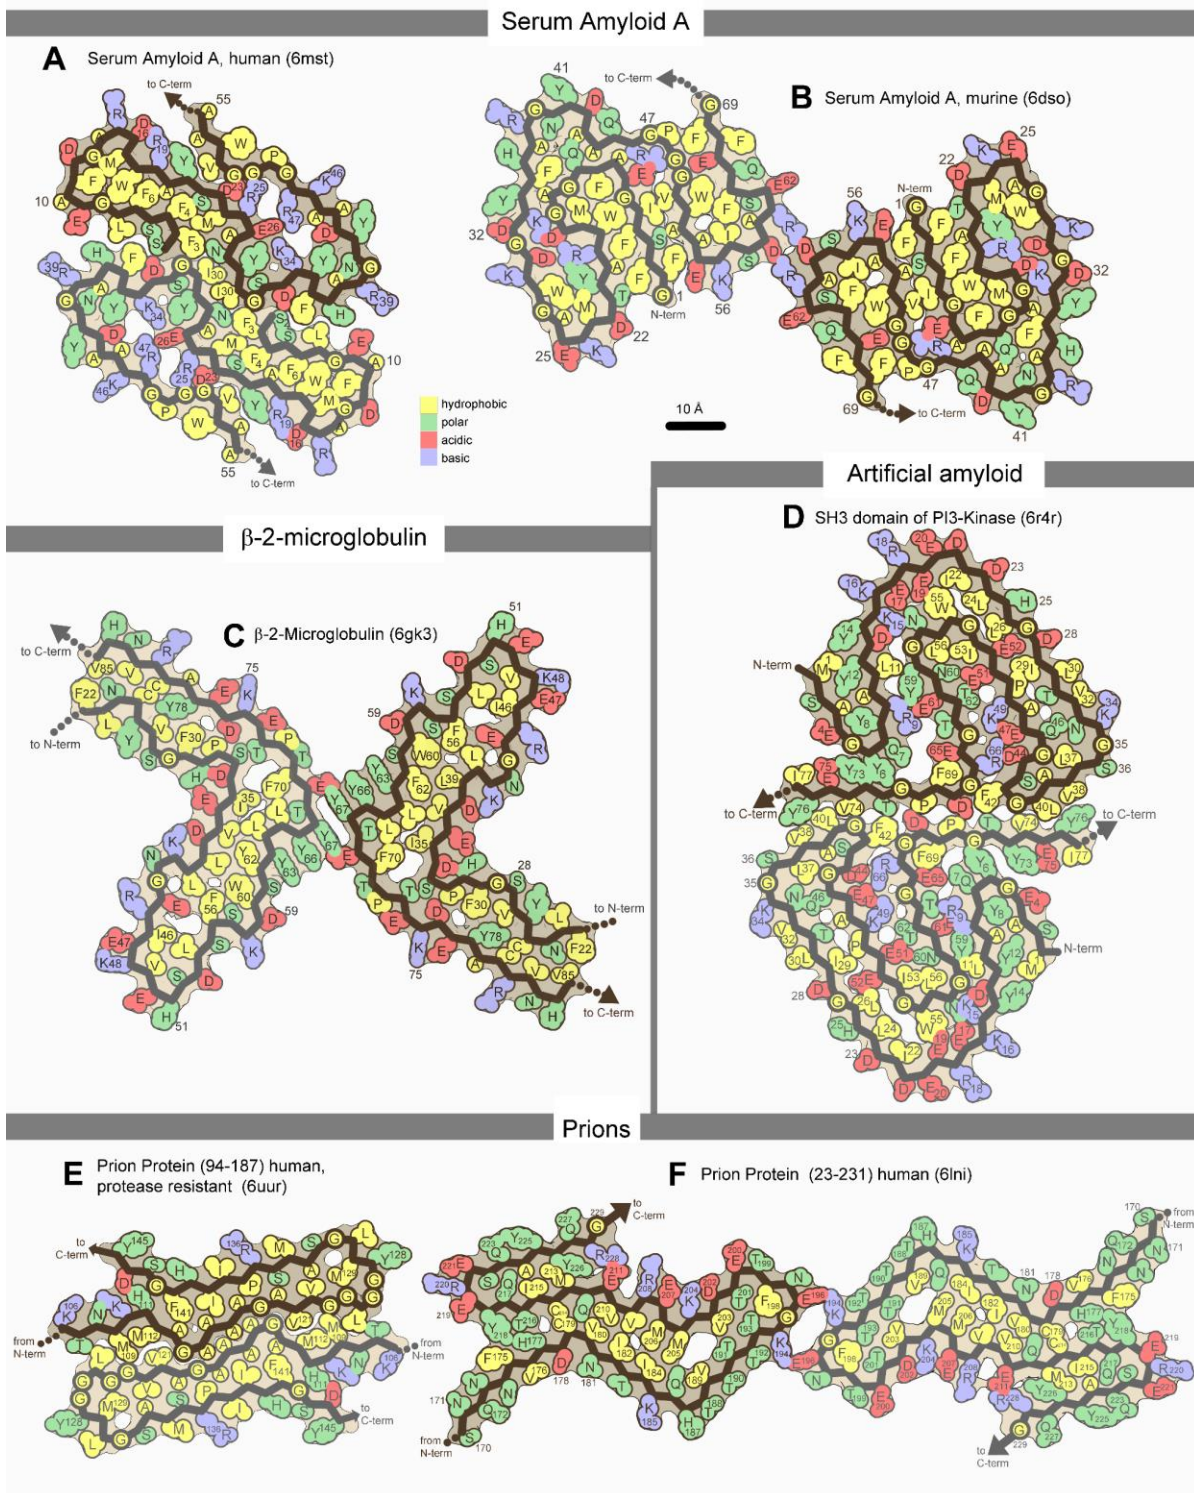

**Supplemental Figure 8. Structures of various amyloid proteins.** (A-B) Serum amyloid A fibrils extracted from AA amyloidosis patients. (C) β-2-microglobulin fibrils are associated with dialysis-related amyloidosis. This fibril was prepared from recombinant protein. (D) The SH3 domain of PI3-Kinase is not associated with disease. It is an artificially created amyloid fibril which has been the subject of extensive mutagenesis to probe the role of sequence on amyloid fibril formation and growth. (E,F) Prion fibrils prepared from recombinant protein.

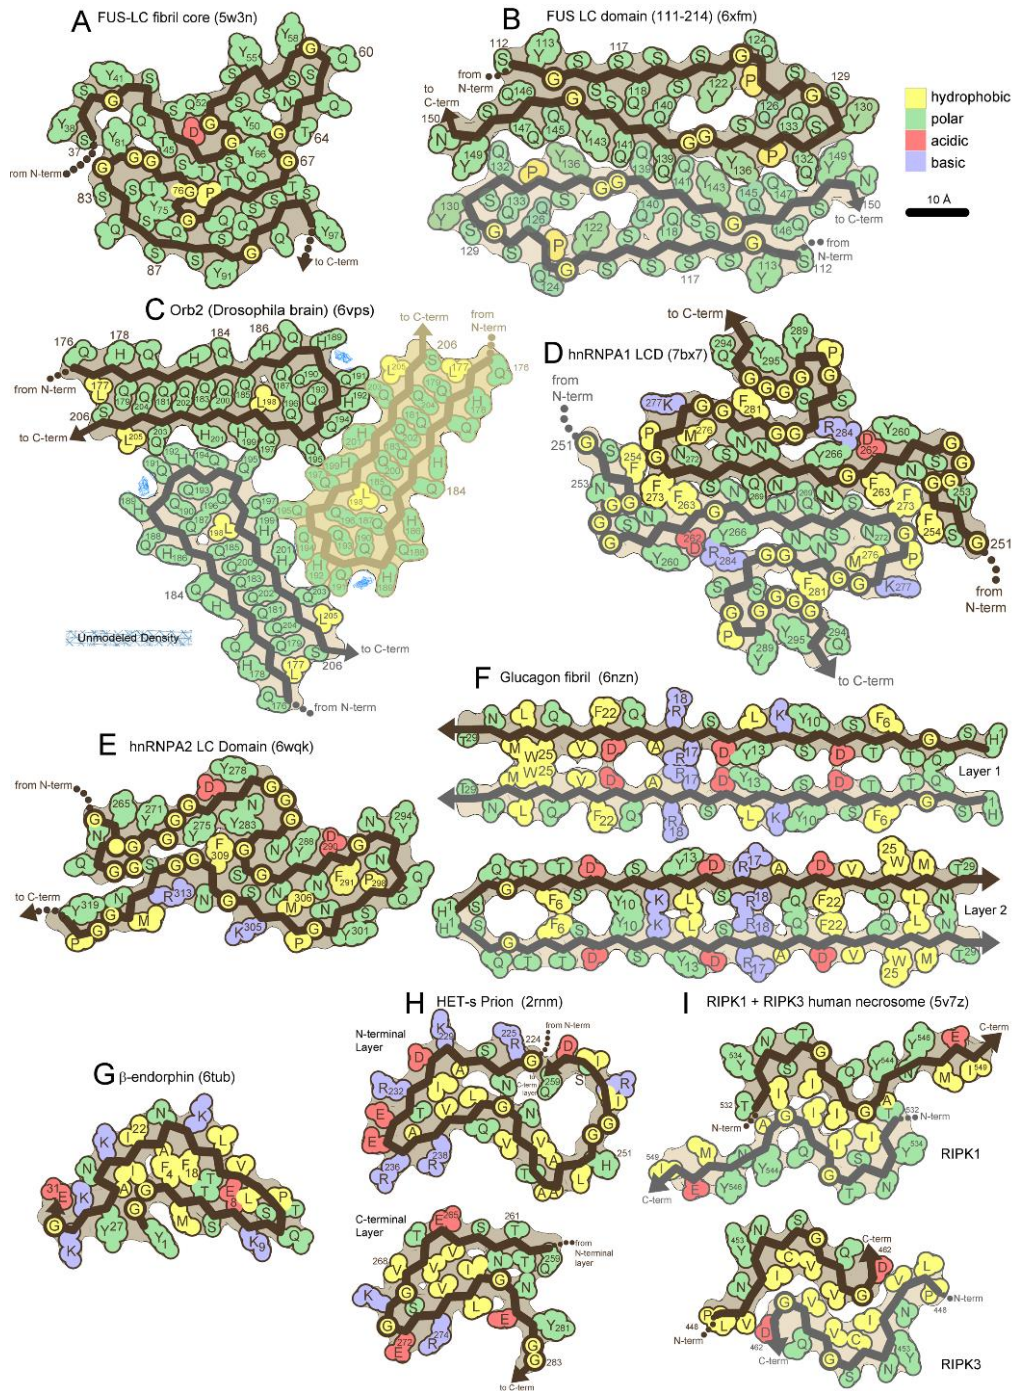

**Supplemental Figure 9.** Proteins that form functional amyloid fibrils. (A and B) FUS LCDs form hydrogels (C) Orb2 (*ex vivo*) aids memory formation (D) hnRNP1 forms a component of stress granules. The fibril depicted here is reportedly pathogenic (E) hnRNP2 also participates in stress granule formation (F) Glucagon is a hormone that regulates blood sugar concentration. Glucagon forms fibrils as a functional mechanism of hormone

storage, but its high propensity fibrilize also has medical implications. Diabetics that require a supplementary source of glucagon dissolve dry glucagon powder (at acidic pH to ensure activity) and this solution must be administered immediately. Delays of only an hour lead to the formation of nuisance fibrils, composed of antiparallel sheets. The alternating antiparallel layers, 1 and 2, are shown separately. This structure may aid in engineering a variant of glucagon that is resistant to fibril formation. (G)  $\beta$ -endorphin, (H) Het-s and (I) RIPK1-RIPK3 fibrils perform a functional role. Het-s and RIPK1-RIPK3 are either biologically irreversible or disassembled by ATP-consuming chaperone. In Het-s fibrils, successive layers alternate between N and C-terminal segments. Similarly, in RIPK1-RIPK3 fibrils, successive layers alternate between RIPK1 and RIPK3. Hence, these fibrils are represented as two distinct layers.

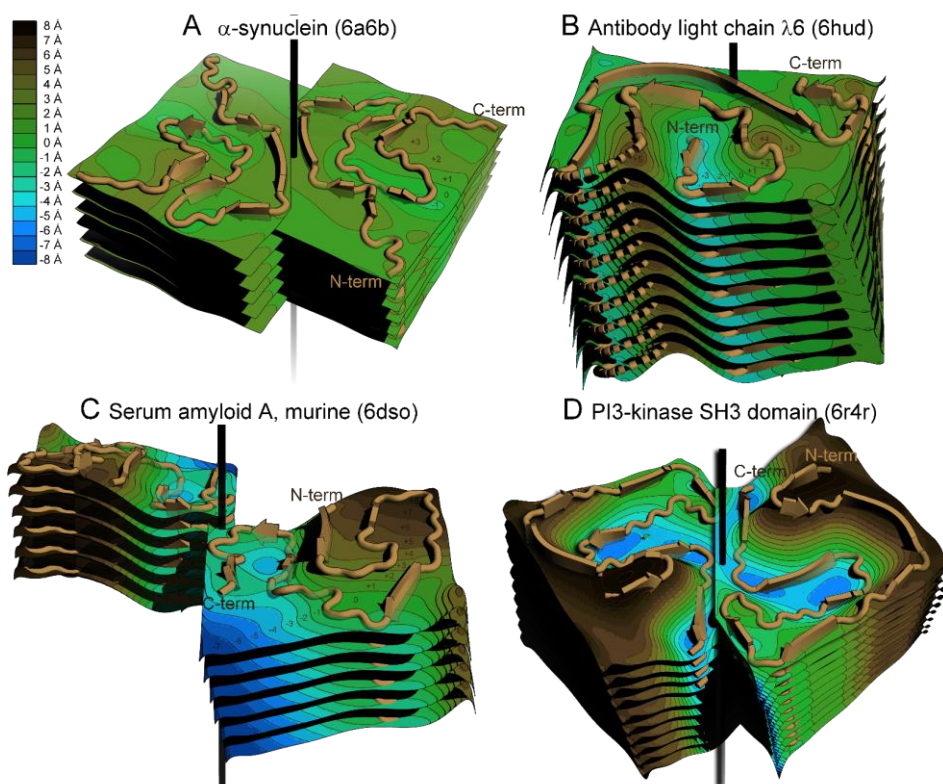

**Supplemental Fig. 10. Amyloid 2D folds exhibit varying degrees of warping.** Warping is defined as the deviation of amyloid protein backbone from its best fit plane. Generally, the best fit plane lies nearly perpendicular to the fibril axis. Each protein chain in this figure was fit to a 2-dimensional surface using a 10-term Maclaurin series. Parts of the chain that dip below the best-fit plane are highlighted by blue depressions and parts of the chain that rise above the best-fit plane are highlighted by brown peaks as indicated by the color gradient key on the left. Deviations from the best-fit plane are typically small (around 1.0 Å RMSD for  $\alpha$ -carbon atoms) as illustrated in Panel A, a topographical map of  $\alpha$ -synuclein (rod polymorph, 6a6b) which is nearly flat. A higher degree of warping (1.9 Å RMSD) is illustrated for antibody light chain amyloid (PDB ID 6hud) in Panel B. Here, alpha carbons deviate from -6 Å to +6 Å from the best-fit plane, giving the appearance of shallow hills and valleys. Panel C and D show examples of more extreme warping. In Serum Amyloid A (6dso) a single chain traverses 16 Å from the highest point near the N-terminus (brown) to its lowest point near the C-terminus (blue), fitting a warped plane that gently tilts ( $14^\circ$ ) away from the fibril normal. In PI3-kinase SH3 domain (6r4r) a single chain traverses about 18 Å along the fibril direction. Here, a steep cliff separates the C-terminus lying in a central depression from the N-terminus skirting a high plateau.

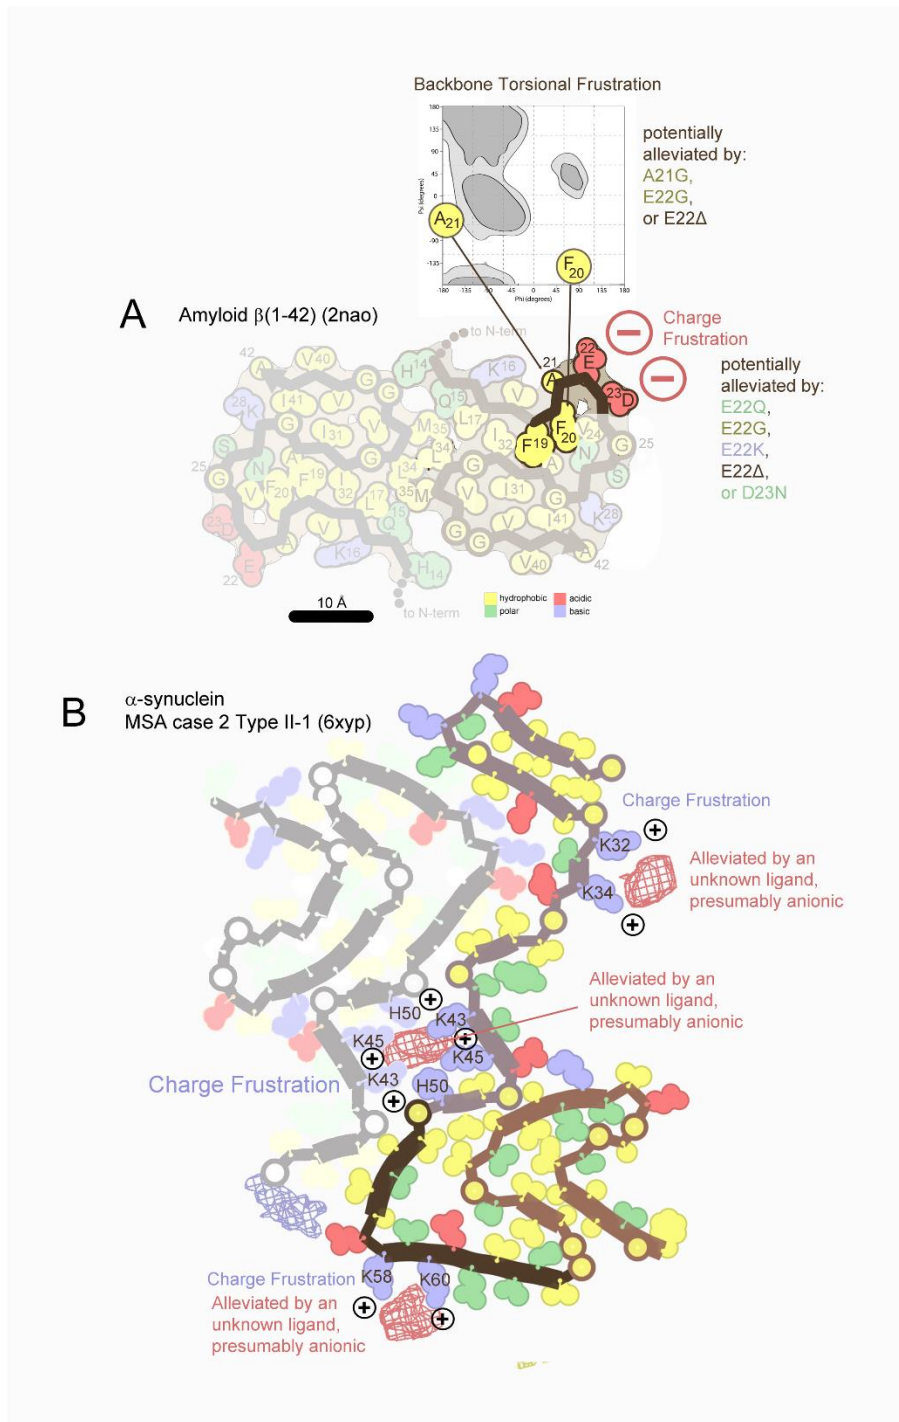

**Supplemental Figure 11. Examples of frustrations in amyloid fibrils and how they might be alleviated.** (A) Backbone torsion frustration in  $\text{A}\beta(1-42)$ , PDB ID 2nao is evident in residues F20 and A21 as Ramachandran plot outliers. This torsional frustration might be alleviated by hereditary mutations which replace residues in this region with amino acids of smaller size. Charge frustration is evident in the adjacent ladders of negative charge at E22 and D23. Charge frustration in this region might be alleviated by hereditary mutations that eliminate negative charge. The early onset of AD caused by these mutations might be explained by their ability to alleviate these frustrations in the fibril and accelerate fibril growth. (B) Charge frustrations are evident in  $\alpha$ -synuclein extracted from MSA patients, PDB ID 6xyp. Residual cryoEM density near these regions of positive charge repulsion might correspond to anions. Growth of this polymorph might depend on the availability of this unknown ligand.

- Evaluate solvent accessible surface area (SASA) of a central strand within an amyloid fibril (Folded state).
- Evaluate SASA of isolated, extended strand using an approximation (Reference state). That is, for residue  $n$ , evaluate SASA for the isolated tripeptide in the absence of side chains on  $n-1$  and  $n+1$ .
- Take the difference,  $SASA_{Ref} - SASA_{Fold}$  for each atom to get area buried.
- Multiply the area buried by the Atomic Solvation Parameter (ASP).

+18 cal/mol/Å<sup>2</sup> for C  
 -5 cal/mol/Å<sup>2</sup> for S  
 -9 cal/mol/Å<sup>2</sup> for N,O uncharged  
 -38, -37 cal/mol/Å<sup>2</sup> for N,O charged

Except in the following cases:

1. ASP=0 for **Asn** or **Gln** side chains N and O elements with two-H-bonds and less than 5 Å<sup>2</sup> SASA.
  2. ASP=0 for backbone N and O elements involved in a H-bond.
  3. ASP>-9 for ionizable N or O elements involved in ion pair and less than 50 Å<sup>2</sup> SASA. Ion pair distance must be less than 4.5 Å. ASP depends on distance as follows: A.S.P. = -9 \* ((dist-2.8Å)/2.8Å)<sup>2</sup>.
  4. Include entropy terms from Koehl & Delarue 1994 scaled by percentage of side chain surface area buried.
- Sum up the energies of all the atoms to get the solvation energy. Negate this value to get stabilization energy.
  - Less sensitive to structural errors than Rosetta.

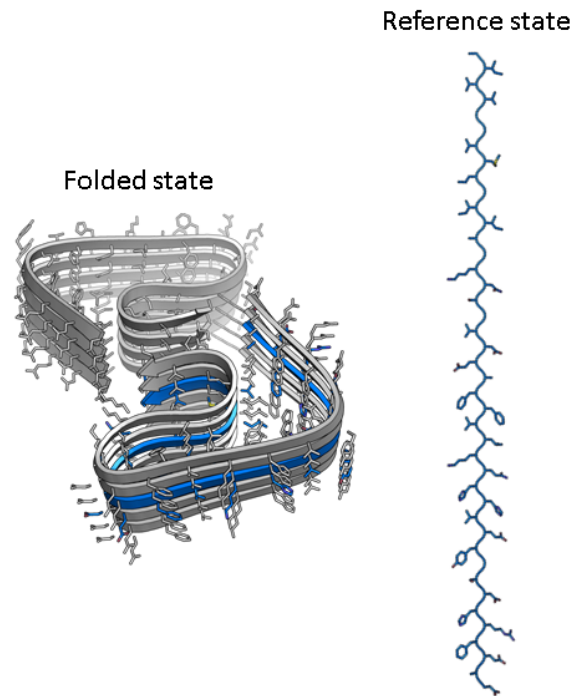

Eisenberg D, Wesson M, Yamashita M (1989) Interpretation of protein folding and binding with atomic solvation parameters. *Chemica Scripta* 29A: 217–221.  
 Koehl P, Delarue M. Application of a self-consistent mean field theory to predict protein side-chains conformation and estimate their conformational entropy. *J Mol Biol.* 1994 Jun 3; 239(2):249-75.

**Supplemental Figure 12. Some details of calculation of solvation energies of stabilization of amyloid fibrils.** The standard free energy of stabilization of a given amyloid chain is computed as the difference in atomic solvation energy of the exposed, solvated chain and the folded chain in the center of five layers of the known structure of a protofilament. The atomic solvation parameters are augmented with terms to describe the entropy change of sidechains upon folding, scaled by the percentage of side chain surface area buried. Current energy evaluations are helpful but incomplete guides to predict lifespans of fibrils.
