# Supplementary material
Source: PubMed Central journal article supplement (PMC8772536)

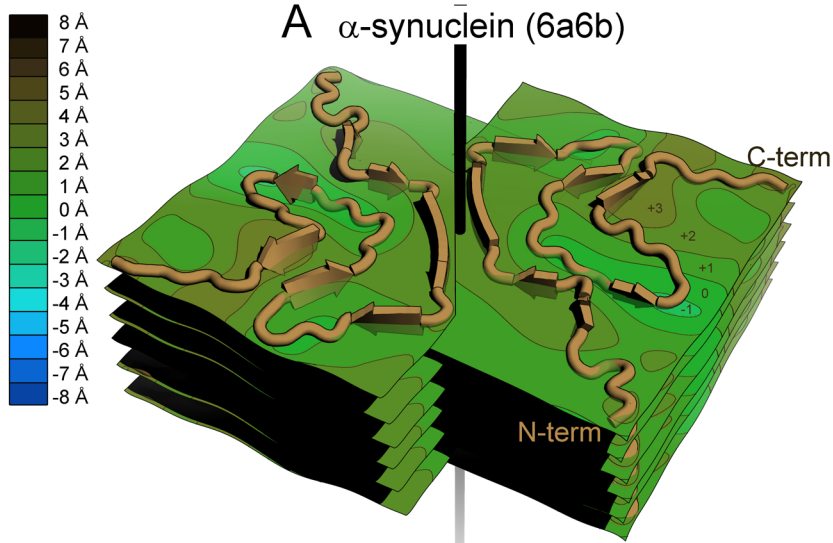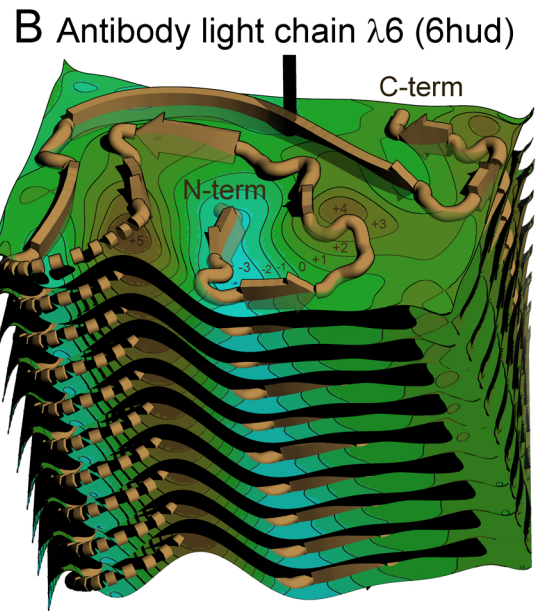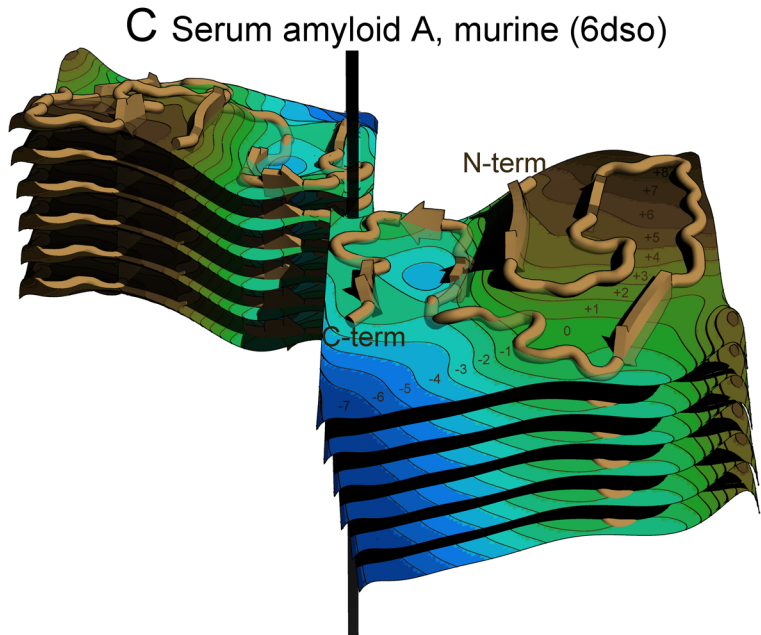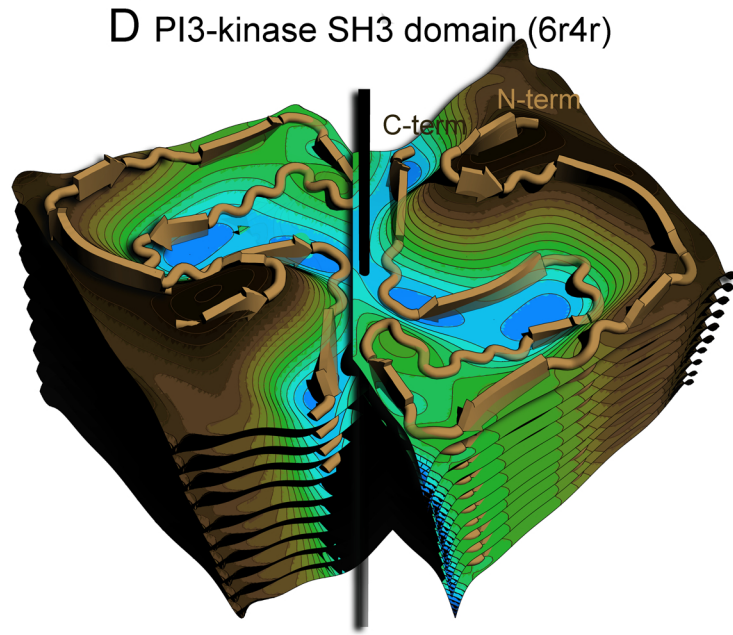

Supplement: NIHMS1739886-supplement-10.pdf [file NIHMS1739886-supplement-10.pdf]

$\alpha$ -synuclein

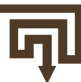

polymorph 0

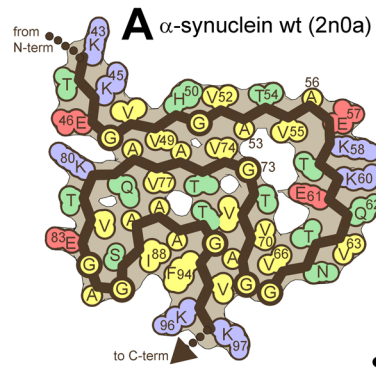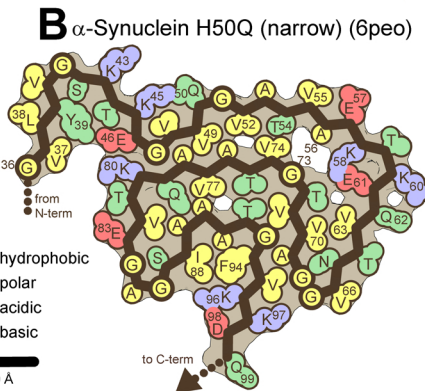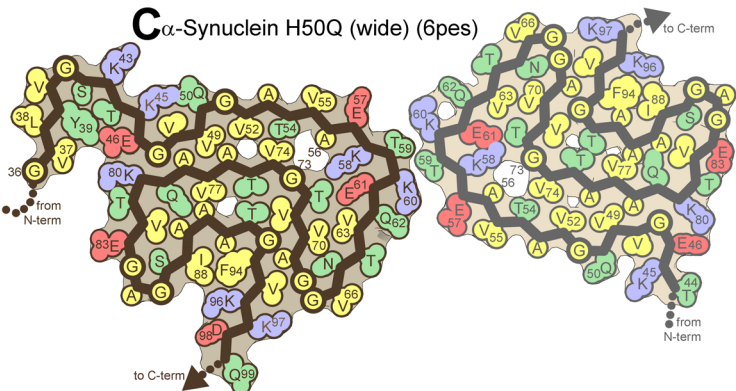

$\alpha$ -synuclein

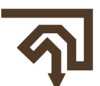

polymorph 1a

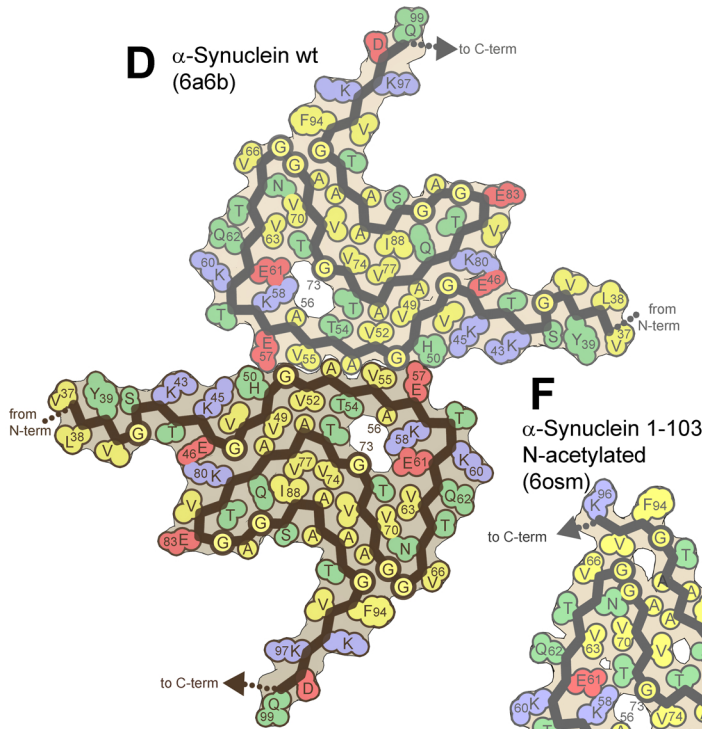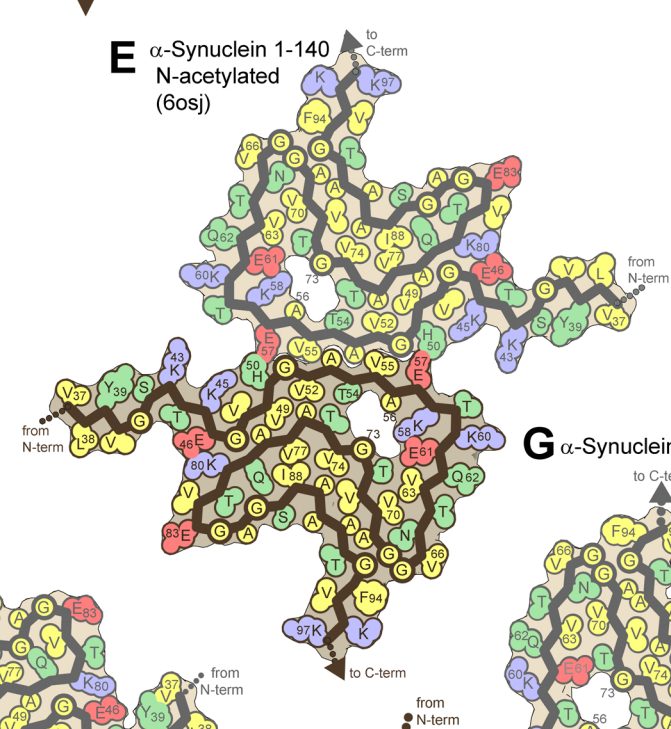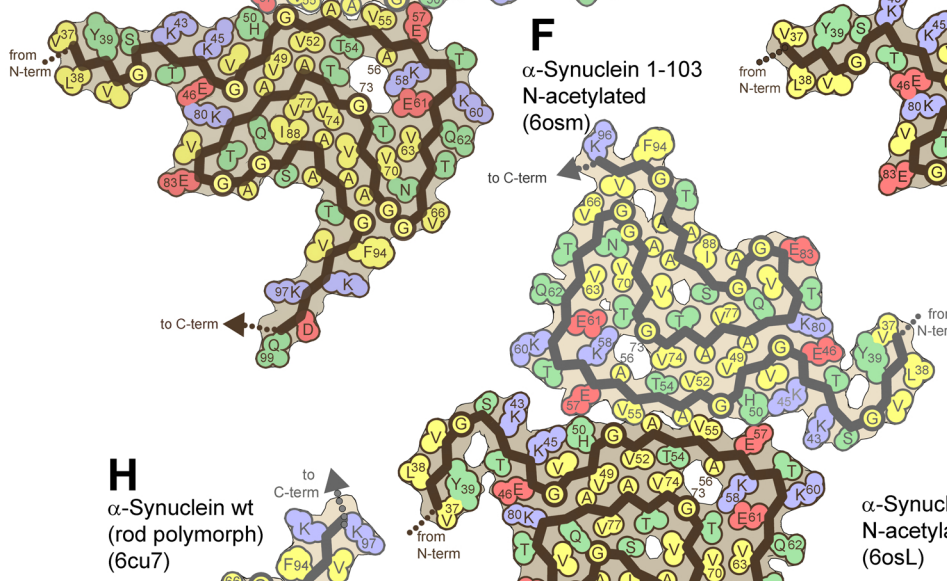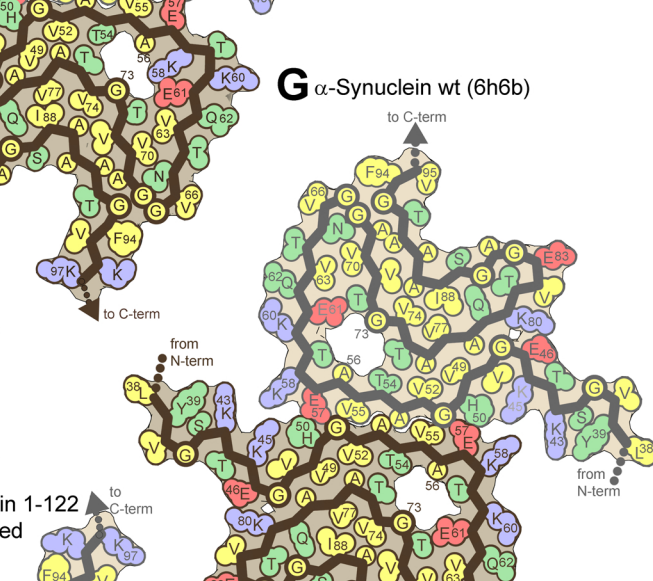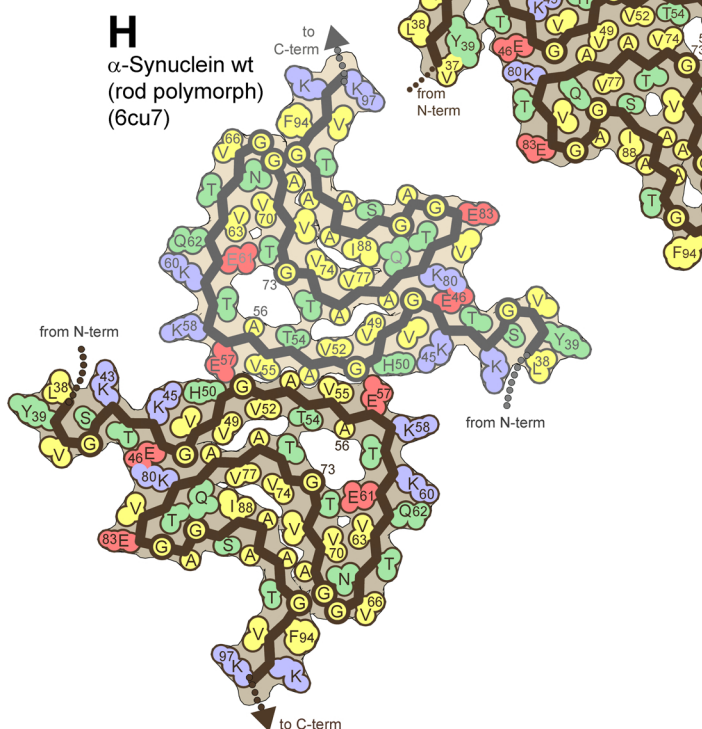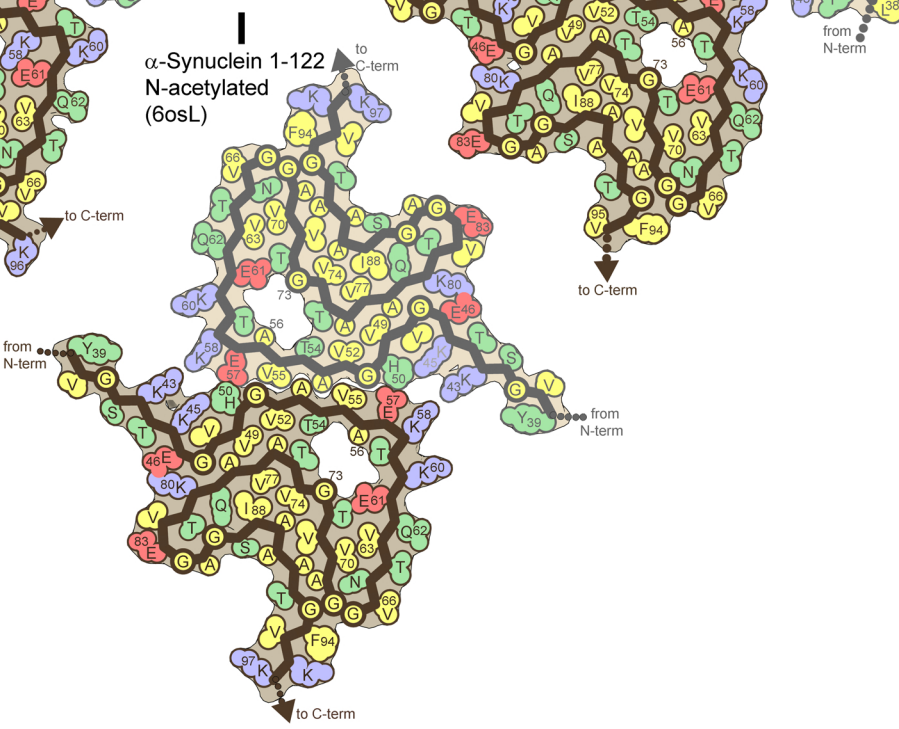

Supplement: NIHMS1739886-supplement-4.pdf [file NIHMS1739886-supplement-4.pdf]

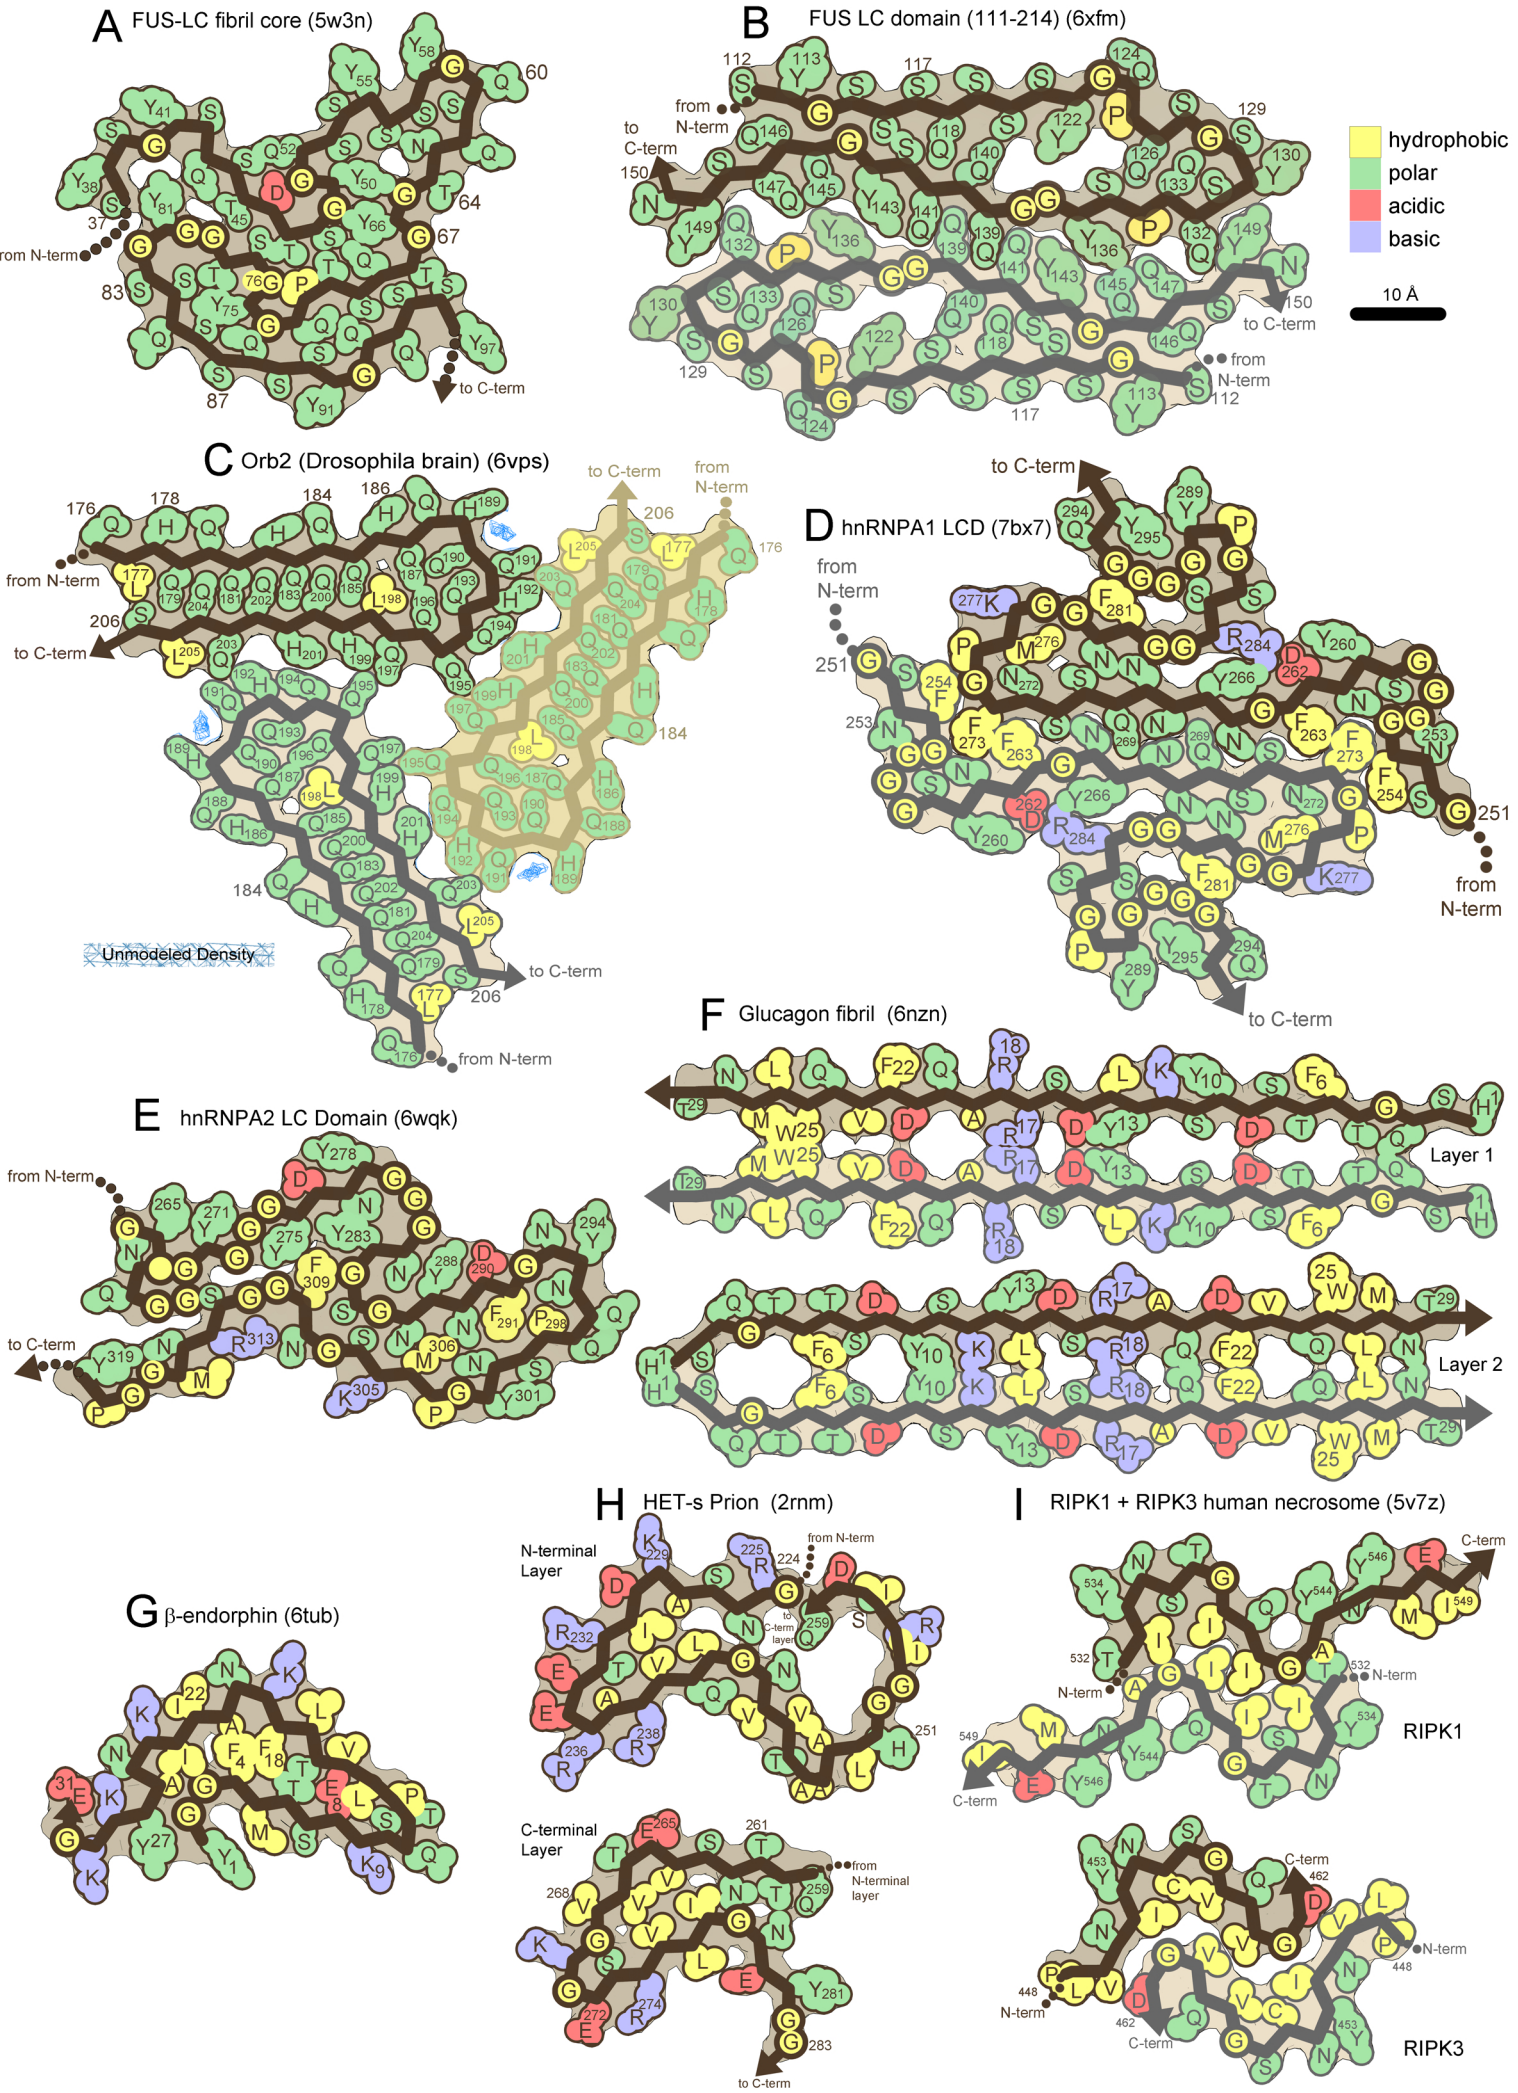

Supplement: NIHMS1739886-supplement-9.pdf [file NIHMS1739886-supplement-9.pdf]
